# Supplementary material for: A systematic review and meta-analysis of cold exposure and cardiovascular disease outcomes
Source: PubMed Central journal article supplement (PMC10083291; doi:10.3389/fcvm.2023.1084611), 2023-03-27
Supplement: Datasheet1.pdf [file Datasheet1.pdf]

## SUPPLEMENTARY MATERIAL

### **A systematic review and meta-analysis of cold exposure and cardiovascular health outcomes**

Jie-Fu Fan†, Yu-Chen Xiao†, Lu-Yu Niu†, Wan-Yang Li, Wei-Zhong Wang & Yang-Kai Wang

Department of Marine Biomedicine and Polar Medicine, Naval Medical University (Second Military Medical University), Shanghai, China.

†These authors have contributed equally to this work.

Short title: Meta-analysis of cold exposure and cardiovascular diseases

#### **Correspondence:**

Prof. Yangkai Wang, Department of Marine Biomedicine and Polar Medicine, Naval Medical University, 880 Xiangyin Road, Shanghai 200433, China.

Email: [wyangkai2005@smmu.edu.cn](mailto:wyangkai2005@smmu.edu.cn)

And Prof. Weizhong Wang, Department of Marine Biomedicine and Polar Medicine, Naval Medical University, 880 Xiangyin Road, Shanghai 200433, China.

Email: [weizhongwang@smmu.edu.cn](mailto:weizhongwang@smmu.edu.cn)

Table S1: Preferred Reporting Items for Systematic Reviews and Meta-Analyses (PRISMA) checklist[1].

| Section and Topic             | Item # | Checklist item                                                                                                                                                                                                                                                                                       | Location where item is reported |
|-------------------------------|--------|------------------------------------------------------------------------------------------------------------------------------------------------------------------------------------------------------------------------------------------------------------------------------------------------------|---------------------------------|
| <b>TITLE</b>                  |        |                                                                                                                                                                                                                                                                                                      |                                 |
| Title                         | 1      | Identify the report as a systematic review.                                                                                                                                                                                                                                                          | 1                               |
| <b>ABSTRACT</b>               |        |                                                                                                                                                                                                                                                                                                      |                                 |
| Abstract                      | 2      | See the PRISMA 2020 for Abstracts checklist.                                                                                                                                                                                                                                                         | 2                               |
| <b>INTRODUCTION</b>           |        |                                                                                                                                                                                                                                                                                                      |                                 |
| Rationale                     | 3      | Describe the rationale for the review in the context of existing knowledge.                                                                                                                                                                                                                          | 4                               |
| Objectives                    | 4      | Provide an explicit statement of the objective(s) or question(s) the review addresses.                                                                                                                                                                                                               | 4                               |
| <b>METHODS</b>                |        |                                                                                                                                                                                                                                                                                                      |                                 |
| Eligibility criteria          | 5      | Specify the inclusion and exclusion criteria for the review and how studies were grouped for the syntheses.                                                                                                                                                                                          | 6                               |
| Information sources           | 6      | Specify all databases, registers, websites, organisations, reference lists and other sources searched or consulted to identify studies. Specify the date when each source was last searched or consulted.                                                                                            | 6                               |
| Search strategy               | 7      | Present the full search strategies for all databases, registers and websites, including any filters and limits used.                                                                                                                                                                                 | S2                              |
| Selection process             | 8      | Specify the methods used to decide whether a study met the inclusion criteria of the review, including how many reviewers screened each record and each report retrieved, whether they worked independently, and if applicable, details of automation tools used in the process.                     | 6                               |
| Data collection process       | 9      | Specify the methods used to collect data from reports, including how many reviewers collected data from each report, whether they worked independently, any processes for obtaining or confirming data from study investigators, and if applicable, details of automation tools used in the process. | 7                               |
| Data items                    | 10a    | List and define all outcomes for which data were sought. Specify whether all results that were compatible with each outcome domain in each study were sought (e.g. for all measures, time points, analyses), and if not, the methods used to decide which results to collect.                        | 7                               |
|                               | 10b    | List and define all other variables for which data were sought (e.g. participant and intervention characteristics, funding sources). Describe any assumptions made about any missing or unclear information.                                                                                         | 7                               |
| Study risk of bias assessment | 11     | Specify the methods used to assess risk of bias in the included studies, including details of the tool(s) used, how many reviewers assessed each study and whether they worked independently, and if applicable, details of automation tools used in the process.                                    | 8                               |
| Effect measures               | 12     | Specify for each outcome the effect measure(s) (e.g. risk ratio, mean difference) used in the synthesis or presentation of results.                                                                                                                                                                  | 7                               |
| Synthesis methods             | 13a    | Describe the processes used to decide which studies were eligible for each synthesis (e.g. tabulating the study intervention characteristics and comparing against the planned groups for each synthesis (item #5)).                                                                                 | 7                               |
|                               | 13b    | Describe any methods required to prepare the data for presentation or synthesis, such as handling of missing summary statistics, or data conversions.                                                                                                                                                | 7                               |
|                               | 13c    | Describe any methods used to tabulate or visually display results of individual studies and syntheses.                                                                                                                                                                                               | 7                               |
|                               | 13d    | Describe any methods used to synthesize results and provide a rationale for the choice(s). If meta-analysis was performed, describe the model(s), method(s) to identify the presence and extent of statistical heterogeneity, and software package(s) used.                                          | 8                               |
|                               | 13e    | Describe any methods used to explore possible causes of heterogeneity among study results (e.g. subgroup analysis, meta-regression).                                                                                                                                                                 | 8                               |
|                               | 13f    | Describe any sensitivity analyses conducted to assess robustness of the synthesized results.                                                                                                                                                                                                         | 8                               |
| Reporting bias assessment     | 14     | Describe any methods used to assess risk of bias due to missing results in a synthesis (arising from reporting biases).                                                                                                                                                                              | 8, S6-9                         |
| Certainty                     | 15     | Describe any methods used to assess certainty (or confidence) in the body of evidence for an outcome.                                                                                                                                                                                                | 8, S9                           |

| Section and Topic                              | Item # | Checklist item                                                                                                                                                                                                                                                                       | Location where item is reported |
|------------------------------------------------|--------|--------------------------------------------------------------------------------------------------------------------------------------------------------------------------------------------------------------------------------------------------------------------------------------|---------------------------------|
| assessment                                     |        |                                                                                                                                                                                                                                                                                      |                                 |
| <b>RESULTS</b>                                 |        |                                                                                                                                                                                                                                                                                      |                                 |
| Study selection                                | 16a    | Describe the results of the search and selection process, from the number of records identified in the search to the number of studies included in the review, ideally using a flow diagram.                                                                                         | 8-9                             |
|                                                | 16b    | Cite studies that might appear to meet the inclusion criteria, but which were excluded, and explain why they were excluded.                                                                                                                                                          | 9                               |
| Study characteristics                          | 17     | Cite each included study and present its characteristics.                                                                                                                                                                                                                            | S4-5                            |
| Risk of bias in studies                        | 18     | Present assessments of risk of bias for each included study.                                                                                                                                                                                                                         | 12, S16                         |
| Results of individual studies                  | 19     | For all outcomes, present, for each study: (a) summary statistics for each group (where appropriate) and (b) an effect estimate and its precision (e.g. confidence/credible interval), ideally using structured tables or plots.                                                     | 9, S10-13                       |
| Results of syntheses                           | 20a    | For each synthesis, briefly summarise the characteristics and risk of bias among contributing studies.                                                                                                                                                                               | 9, 11                           |
|                                                | 20b    | Present results of all statistical syntheses conducted. If meta-analysis was done, present for each the summary estimate and its precision (e.g. confidence/credible interval) and measures of statistical heterogeneity. If comparing groups, describe the direction of the effect. | 9-11, S15-16                    |
|                                                | 20c    | Present results of all investigations of possible causes of heterogeneity among study results.                                                                                                                                                                                       | 11, S15-16                      |
|                                                | 20d    | Present results of all sensitivity analyses conducted to assess the robustness of the synthesized results.                                                                                                                                                                           | 11, S14-15                      |
| Reporting biases                               | 21     | Present assessments of risk of bias due to missing results (arising from reporting biases) for each synthesis assessed.                                                                                                                                                              | S18-22                          |
| Certainty of evidence                          | 22     | Present assessments of certainty (or confidence) in the body of evidence for each outcome assessed.                                                                                                                                                                                  | 12, 17                          |
| <b>DISCUSSION</b>                              |        |                                                                                                                                                                                                                                                                                      |                                 |
| Discussion                                     | 23a    | Provide a general interpretation of the results in the context of other evidence.                                                                                                                                                                                                    | 13-14                           |
|                                                | 23b    | Discuss any limitations of the evidence included in the review.                                                                                                                                                                                                                      | 17                              |
|                                                | 23c    | Discuss any limitations of the review processes used.                                                                                                                                                                                                                                | 17                              |
|                                                | 23d    | Discuss implications of the results for practice, policy, and future research.                                                                                                                                                                                                       | 17                              |
| <b>OTHER INFORMATION</b>                       |        |                                                                                                                                                                                                                                                                                      |                                 |
| Registration and protocol                      | 24a    | Provide registration information for the review, including register name and registration number, or state that the review was not registered.                                                                                                                                       | 6                               |
|                                                | 24b    | Indicate where the review protocol can be accessed, or state that a protocol was not prepared.                                                                                                                                                                                       | 6                               |
|                                                | 24c    | Describe and explain any amendments to information provided at registration or in the protocol.                                                                                                                                                                                      | 6                               |
| Support                                        | 25     | Describe sources of financial or non-financial support for the review, and the role of the funders or sponsors in the review.                                                                                                                                                        | 18                              |
| Competing interests                            | 26     | Declare any competing interests of review authors.                                                                                                                                                                                                                                   | 18                              |
| Availability of data, code and other materials | 27     | Report which of the following are publicly available and where they can be found: template data collection forms; data extracted from included studies; data used for all analyses; analytic code; any other materials used in the review.                                           | 6                               |

Table S2: Search strategy: databases, terms, filters and number of articles for review.

| Database | Strategy                                                                                                                                                  | Number of hits | Number imported into Endnote |
|----------|-----------------------------------------------------------------------------------------------------------------------------------------------------------|----------------|------------------------------|
| PubMed   | #1 weather [MH] OR climate change [MH] OR temperature [TW] OR season [TW] OR cold temperature [TW] OR cold season [TW] OR cold spell [TW] OR cold weather | 228,591        |                              |

|                                                                                           |                                                                                                                                                                                                                                                                                                                                                                                                                                                                                                                                                                                                                                                                                                                                                                                                                                                                                                                                                                                                                                                                                                                                                                                                                       |                                                                                                                                                                        |              |
|-------------------------------------------------------------------------------------------|-----------------------------------------------------------------------------------------------------------------------------------------------------------------------------------------------------------------------------------------------------------------------------------------------------------------------------------------------------------------------------------------------------------------------------------------------------------------------------------------------------------------------------------------------------------------------------------------------------------------------------------------------------------------------------------------------------------------------------------------------------------------------------------------------------------------------------------------------------------------------------------------------------------------------------------------------------------------------------------------------------------------------------------------------------------------------------------------------------------------------------------------------------------------------------------------------------------------------|------------------------------------------------------------------------------------------------------------------------------------------------------------------------|--------------|
| <p><b>Filters:</b></p> <p><b>English, Human,</b></p> <p><b>Full text</b></p>              | <p>[TW]</p> <p>#2 cardiovascular diseases [MH] OR heart diseases [TW] OR vascular diseases [TW] OR hypertensive disease [TW] OR myocardial infarction [TW] OR stroke [TW] OR heart failure [TW] OR arrhythmia [TW] OR cardiac arrest [TW] OR rheumatic heart disease [TW] OR thrombosis [TW] OR thrombotic disease [TW] OR pulmonary heart disease [TW] OR peripheral artery disease [TW] OR aortic aneurysm [TW] OR aortic dissection [TW]</p> <p>#3 epidemiology [MH] OR mortality [TW] OR morbidity [TW] OR incidence [TW] OR prevalence [TW] OR outbreak [TW] OR surveillance [TW] OR occurrence [TW] OR hospital [TW] OR death [TW]</p> <p>#1 AND #2 AND #3</p>                                                                                                                                                                                                                                                                                                                                                                                                                                                                                                                                                  | <p>2,915,117</p> <p>2,963,121</p>                                                                                                                                      | <p>9,675</p> |
| <p><b>Cochrane</b></p> <p><b>Filters:</b></p> <p><b>In trails</b></p>                     | <p>#1 ("climate change"):ti,ab,kw OR (temperature):ti,ab,kw OR (season):ti,ab,kw OR ("cold spell"):ti,ab,kw OR ("cold weather"):ti,ab,kw (Word variations have been searched)</p> <p>#2 MeSH descriptor: [Weather] explode all trees</p> <p>#3("heart diseases"):ti,ab,kw OR ("vascular diseases"):ti,ab,kw OR ("hypertensive disease"):ti,ab,kw OR ("myocardial infarction"):ti,ab,kw OR (stroke):ti,ab,kw</p> <p>#4 ("heart failure"):ti,ab,kw OR (arrhythmia):ti,ab,kw OR ("cardiac arrest"):ti,ab,kw</p> <p>#5("rheumatic heart disease"):ti,ab,kw OR ("thrombotic disease"):ti,ab,kw OR ("pulmonary heart disease"):ti,ab,kw OR ("aortic aneurysm and dissection"):ti,ab,kw OR ("peripheral artery disease"):ti,ab,kw</p> <p>#6 MeSH descriptor: [Cardiovascular Diseases] explode all trees</p> <p>#7 (mortality):ti,ab,kw OR (morbidity):ti,ab,kw OR (incidence):ti,ab,kw AND (prevalence):ti,ab,kw AND (outbreak):ti,ab,kw</p> <p>#8 (surveillance):ti,ab,kw OR (occurrence):ti,ab,kw OR (hospital):ti,ab,kw AND (death):ti,ab,kw</p> <p>#9 MeSH descriptor: [Epidemiology] explode all trees</p> <p>#10 #1 OR #2</p> <p>#11 #3 OR #4 OR #5 OR #6</p> <p>#12 #7 OR #8 OR #9</p> <p>#13 #10 AND #11 AND#12</p> | <p>35,192</p> <p>6,125</p> <p>110,237</p> <p>46,428</p> <p>15,977</p> <p>118,039</p> <p>128,815</p> <p>60,131</p> <p>42</p> <p>36559</p> <p>445,827</p> <p>171,706</p> | <p>1,733</p> |
| <p><b>Scopus</b></p> <p><b>Filters:</b></p> <p><b>English,</b></p> <p><b>Article,</b></p> | <p>#1 (ALL ("climate change") OR TITLE-ABS-KEY (weather) OR TITLE-ABS-KEY ("low temperature") OR TITLE-ABS-KEY (season) OR TITLE-ABS-KEY ("cold temperature") OR TITLE-ABS-KEY ("cold spell") OR TITLE-ABS-KEY ("cold weather") OR TITLE-ABS-KEY ("cold season"))</p> <p>#2 (ALL ("cardiovascular diseases ") OR TITLE-ABS-KEY ("hypertensive disease") OR TITLE-ABS-KEY ("heart diseases") OR TITLE-ABS-KEY ("vascular diseases") OR TITLE-ABS-KEY (stroke) OR TITLE-ABS-KEY ("myocardial infarction") OR TITLE-ABS-KEY ("heart failure") OR TITLE-ABS-KEY (arrhythmia) OR</p>                                                                                                                                                                                                                                                                                                                                                                                                                                                                                                                                                                                                                                       | <p>2,374,448</p> <p>3,016,495</p>                                                                                                                                      |              |

|                      |                                                                                                                                                                                                                                                                                                                                                                                                                                                                                                                                                                                                 |           |        |
|----------------------|-------------------------------------------------------------------------------------------------------------------------------------------------------------------------------------------------------------------------------------------------------------------------------------------------------------------------------------------------------------------------------------------------------------------------------------------------------------------------------------------------------------------------------------------------------------------------------------------------|-----------|--------|
|                      | TITLE-ABS-KEY ("cardiac arrest") OR TITLE-ABS-KEY ("rheumatic heart disease")<br>OR TITLE-ABS-KEY ("thrombotic disease") OR TITLE-ABS-KEY (thrombosis) OR<br>TITLE-ABS-KEY ("pulmonary heart disease") OR TITLE-ABS-KEY ("aortic<br>aneurysm") OR TITLE-ABS-KEY ("aortic dissection") OR TITLE-ABS-KEY<br>("peripheral artery disease")<br><br>#3 (ALL (epidemiology) OR TITLE-ABS-KEY (mortality) OR TITLE-ABS-KEY<br>(morbidity) OR TITLE-ABS-KEY (prevalence) OR TITLE-ABS-KEY (incidence) OR<br>TITLE-ABS-KEY ("hospital admission") OR TITLE-ABS-KEY (occurrence))<br><br>#1 AND #2 AND #3 | 7,885,815 | 10,316 |
| <b>Total results</b> |                                                                                                                                                                                                                                                                                                                                                                                                                                                                                                                                                                                                 |           | 21,724 |

All the included articles[2-160].

Table S3: Rating tool of risk of bias assessment of included study, modified according to the OHAT[161,162].

|                            | Risk of Bias Questions                                                                                                                                                                                                                                                                                                                   | Answer                                                                                                                                                                                                                                                                                                                                                                                                                                                                                                                                                                                                                                                                                                                                                                                                                                    |
|----------------------------|------------------------------------------------------------------------------------------------------------------------------------------------------------------------------------------------------------------------------------------------------------------------------------------------------------------------------------------|-------------------------------------------------------------------------------------------------------------------------------------------------------------------------------------------------------------------------------------------------------------------------------------------------------------------------------------------------------------------------------------------------------------------------------------------------------------------------------------------------------------------------------------------------------------------------------------------------------------------------------------------------------------------------------------------------------------------------------------------------------------------------------------------------------------------------------------------|
| <b>Key Criteria</b>        |                                                                                                                                                                                                                                                                                                                                          |                                                                                                                                                                                                                                                                                                                                                                                                                                                                                                                                                                                                                                                                                                                                                                                                                                           |
| <b>Exposure assessment</b> | Includes measurement error or measurement limitations.<br><br>List of major considerations:<br><br>1) more than one monitoring station per a large geographical area<br><br>2) daily ambient temperature measurements were available                                                                                                     | -LOW: There is high confidence that the exposure to ambient temperature is the true average population exposure (e.g. using gridded temperature data-interpolated or population weighted temperature).<br><br>-PROBABLY LOW: There is indirect evidence that suggests low risk of bias, or one of the three listed considerations is not applied (e.g. averaged temperatures from several weather stations).<br><br>-PROBABLY HIGH: There is insufficient information to permit a judgment of high risk of bias, but there is indirect evidence that suggests high risk of bias. Additionally, two out of the three listed considerations are not applied (e.g. use of single weather station).<br><br>-HIGH: There is direct evidence of high risk of misclassification bias, or all three of the listed considerations are not applied. |
| <b>Outcome assessment</b>  | Includes blinding, systematic errors, or not comparable outcome measurement across exposure groups.<br><br>List of major considerations:<br><br>1) outcome measurements were not influenced by knowledge of the exposure (data were obtained from different databases)<br><br>2) validity of disease classification methods (ICD coding) | -LOW: mortality and morbidity cause classified based on diagnosis standard criteria (International Classification System – ICD code) and provided by a National or Regional Database.<br><br>-PROBABLY LOW: outcome was assessed based on diagnosis standard criteria (ICD) and collected by researcher, but did not specify the data source.<br><br>-PROBABLY HIGH: outcome was not assessed based on standard diagnosis criteria. Additionally, there is evidence that suggests the existence of misclassification bias.<br><br>-HIGH: Outcome was assessed based on self-reports (parents, family) and data                                                                                                                                                                                                                            |

|                                   |                                                                                                                                                                                                                                                                                                                                 |                                                                                                                                                                                                                                                                                                                                                                                                                                                                                                                                                                                                                                                                                                                                                                                                                                                                                                                                                                                                                                                                                                                                                                                                                                                                                                                                                                      |
|-----------------------------------|---------------------------------------------------------------------------------------------------------------------------------------------------------------------------------------------------------------------------------------------------------------------------------------------------------------------------------|----------------------------------------------------------------------------------------------------------------------------------------------------------------------------------------------------------------------------------------------------------------------------------------------------------------------------------------------------------------------------------------------------------------------------------------------------------------------------------------------------------------------------------------------------------------------------------------------------------------------------------------------------------------------------------------------------------------------------------------------------------------------------------------------------------------------------------------------------------------------------------------------------------------------------------------------------------------------------------------------------------------------------------------------------------------------------------------------------------------------------------------------------------------------------------------------------------------------------------------------------------------------------------------------------------------------------------------------------------------------|
|                                   |                                                                                                                                                                                                                                                                                                                                 | collected by the researcher. Additionally, there is evidence that suggests the high risk of misclassification bias.                                                                                                                                                                                                                                                                                                                                                                                                                                                                                                                                                                                                                                                                                                                                                                                                                                                                                                                                                                                                                                                                                                                                                                                                                                                  |
| <b>Confounding bias</b>           | <p>List of major considerations:</p> <p>1) study appropriately accounted for all important well studied potential confounders (seasonality, time trends, day of week, relative humidity).<sup>4</sup></p> <p>2) did the authors use an appropriate analysis method or study design that controlled for confounding domains?</p> | <p>-LOW: study accounted for all important confounders which were measured consistently.</p> <p>-PROBABLY LOW: study accounted for most of confounders AND is not expected to introduce bias.</p> <p>-PROBABLY HIGH: study accounted for some but not all confounders AND is expected to introduce bias</p> <p>-HIGH: study did not account for potential confounders OR were inappropriately measured</p>                                                                                                                                                                                                                                                                                                                                                                                                                                                                                                                                                                                                                                                                                                                                                                                                                                                                                                                                                           |
| <b>Other Criteria</b>             |                                                                                                                                                                                                                                                                                                                                 |                                                                                                                                                                                                                                                                                                                                                                                                                                                                                                                                                                                                                                                                                                                                                                                                                                                                                                                                                                                                                                                                                                                                                                                                                                                                                                                                                                      |
| <b>Selection/recruitment bias</b> | <p>List of major considerations:</p> <p>1) does the selection of participants into the study was done in a manner that might introduce bias in the study?</p> <p>(e.g. study only certain days, and not all days, seasons were included)</p>                                                                                    | <p>-LOW: The descriptions of the studied population were sufficiently detailed to support the assertion that risk of selection effects was minimal (e.g., all relevant mortality and morbidity outcomes in the study setting were reported and included in the study, participants in all exposure levels and with all outcomes had equal opportunity to be included in the study).</p> <p>-PROBABLY LOW: There is insufficient information about population selection to permit a judgment of low risk of bias, but there is indirect evidence that suggests low risk of bias (e.g., participants in all exposure levels may not have equal opportunity to be in the study).</p> <p>-PROBABLY HIGH: There is insufficient information about population selection to permit a judgment of high risk of bias, but there is indirect evidence that suggests high risk of bias (e.g., participants in all exposure levels did not have equal opportunity to be in the study; but not to the extent that seriously bias the effect estimates).</p> <p>- HIGH: There were indications from descriptions of the studied population of high risk of bias (study only included designated high-risk participants, and participants in all exposure levels did not have equal opportunity to be in the study, to the extent that effect estimates were seriously biased).</p> |
| <b>Incomplete outcome data</b>    | <p>List of major considerations:</p> <p>1) missing data of outcome measures?</p> <p>2) missing data of exposures?</p>                                                                                                                                                                                                           | <p>-LOW: no missing outcome data or missing data are unrelated to true outcome.</p> <p>-PROBABLY LOW: there was insufficient information about incomplete data to judge for low risk, but indirect evidence that suggests low risk of bias (e.g., &lt;10% missing data, or missing data related to outcome or exposure data imputed using appropriate method).</p>                                                                                                                                                                                                                                                                                                                                                                                                                                                                                                                                                                                                                                                                                                                                                                                                                                                                                                                                                                                                   |

|                              |                                                                                                                                                                                                                                                |                                                                                                                                                                                                                                                                                                                                                                                                                                                                                                                                                                                                                                                                                                                                                                                                                                                                                                                                                      |
|------------------------------|------------------------------------------------------------------------------------------------------------------------------------------------------------------------------------------------------------------------------------------------|------------------------------------------------------------------------------------------------------------------------------------------------------------------------------------------------------------------------------------------------------------------------------------------------------------------------------------------------------------------------------------------------------------------------------------------------------------------------------------------------------------------------------------------------------------------------------------------------------------------------------------------------------------------------------------------------------------------------------------------------------------------------------------------------------------------------------------------------------------------------------------------------------------------------------------------------------|
|                              |                                                                                                                                                                                                                                                | <p>-PROBABLY HIGH: there was insufficient information about incomplete data to judge for high risk, but indirect evidence that suggests high risk bias (e.g., <math>\geq 10\%</math> missing data without imputed using appropriate method, while rationale for attrition explained in the manuscript with possible methods have been used to properly account for it).</p> <p>-HIGH: missing outcome data are related to true outcome (e.g., substantial missing exposure data (<math>\geq 10\%</math>), rationale for missing data not explained in the manuscript).</p>                                                                                                                                                                                                                                                                                                                                                                           |
| <b>Selective reporting</b>   | <p>List of major considerations:</p> <p>1) do the authors report a prior primary and secondary study aims?</p> <p>2) study reports data analysis over a complete or original database, with no selective reporting of outcomes or analysis</p> | <p>-LOW: all of the studies pre-specified outcomes and findings are reported (i.e., effect estimates presented for all hypothesis tested as per aims)</p> <p>-PROBABLY LOW: there was insufficient information about selective outcome to judge for low risk, but indirect evidence that suggests study was free of selective report (i.e., effect estimates presented for less than all hypotheses tested as per aims; but evidence suggests that effect estimates unlikely to be seriously biased).</p> <p>-PROBABLY HIGH: there was insufficient information about selective reporting to judge for high risk, but indirect evidence suggests that study was not free of selective reporting</p> <p>-HIGH: not all pre-specified outcomes and findings were reported (i.e., effect estimates presented for less than all hypotheses tested as per aims, and with direct evidence suggest that effect estimates likely to be seriously biased)</p> |
| <b>Conflict of interest</b>  | <p>Potential source of bias in reporting through source of funding</p>                                                                                                                                                                         | <p>-LOW: the study did not receive funding from an entity with financial interest in the outcome of study (e.g. funding source is limited to government or academic grants, authors make a claim denying conflicts of interest)</p> <p>-PROBABLY LOW: there is insufficient information to judge for low risk, but indirect evidence suggests study was free of financial interest</p> <p>-PROBABLY HIGH: there is insufficient information to judge for high risk, but indirect evidence suggests study was not free of financial interest</p> <p>-HIGH: study received support from an entity with financial interest in the outcome of study (e.g., authors/staff from study was employee or otherwise affiliated with an entity with financial interest in the study outcome, authors claim a conflict of interest)</p>                                                                                                                          |
| <b>Other sources of bias</b> | <p>Bias due to other problems not covered elsewhere</p>                                                                                                                                                                                        | <p>-LOW: No other sources of bias</p> <p>-PROBABLY LOW: there is insufficient information to judge for low risk, but indirect evidence suggests study was free of other problems</p>                                                                                                                                                                                                                                                                                                                                                                                                                                                                                                                                                                                                                                                                                                                                                                 |

|  |  |                                                                                                                                                                                                                                                                                                                                                                       |
|--|--|-----------------------------------------------------------------------------------------------------------------------------------------------------------------------------------------------------------------------------------------------------------------------------------------------------------------------------------------------------------------------|
|  |  | <p>-PROBABLY HIGH: there is insufficient information to judge for high risk, but indirect evidence suggests study was not free of other problems</p> <p>-HIGH: at least one important risk of bias (e.g., selective reporting of subgroups, a potential source of bias related to the specific study design used, study has been claimed to have been fraudulent)</p> |
|--|--|-----------------------------------------------------------------------------------------------------------------------------------------------------------------------------------------------------------------------------------------------------------------------------------------------------------------------------------------------------------------------|

Table S4: Judgement of overall risk of bias rating.

| Overall Rating            | Combinations (three key components of exposure assessment, outcome assessment, and confounding bias)                |
|---------------------------|---------------------------------------------------------------------------------------------------------------------|
| <b>High (H)</b>           | High + High + (High / Probably high / Probably low / Low)<br>High + Probably high + Probably high                   |
| <b>Probably high (PH)</b> | High + Probably high + (Probably low / Low)<br>Probably high + Probably high + (Probably high / Probably low / Low) |
| <b>Probably low (PL)</b>  | Probably high + (Probably low / Low) + (Probably low / Low)<br>Probably low + Probably low + Low                    |
| <b>Low (L)</b>            | Probably low + Low + Low<br>Low + Low + Low                                                                         |

Table S5: Rating tool of evaluation of quality and strength of the body of evidence. According to Johnson et al[163].

| Evaluation factors                  | Summary of criteria                                                                                                                                                                                                                                                                                                                 |
|-------------------------------------|-------------------------------------------------------------------------------------------------------------------------------------------------------------------------------------------------------------------------------------------------------------------------------------------------------------------------------------|
| <b>Downgrading factors</b>          |                                                                                                                                                                                                                                                                                                                                     |
| <b>Risk of bias</b>                 | Study limitations include a substantial risk of bias across the body of evidence. Risk of bias was assessed by sensitivity analyses, excluding studies rated “high” and/or “probably high” risk of bias. The quality of body of evidence was downgraded if there was substantial difference between values of sensitivity analysis. |
| <b>Indirectness</b>                 | Evidence was not directly comparable to the primary objective of interest i.e., participants, exposure, comparisons, outcome (PECO).                                                                                                                                                                                                |
| <b>Inconsistency</b>                | Estimates of effect in similar populations were widely different (significantly high heterogeneity <i>I</i> <sup>2</sup> or variability in results). In addition, the evidence was downgraded if the 80% precision interval included unity and was more than twice the random effects meta-analysis confidence interval.            |
| <b>Imprecision</b>                  | Studies included few participants and small sample sizes (wide confidence interval as judged by reviewers).                                                                                                                                                                                                                         |
| <b>Publication bias</b>             | Studies were missing from body of evidence, resulting in an over- or underestimate of true effects from exposure. The evidence of publication bias was inspected visually in the funnel plots and egger’s test. The <i>Trim and Fill</i> procedure was used to estimate potentially missing studies.                                |
| <b>Upgrading factors</b>            |                                                                                                                                                                                                                                                                                                                                     |
| <b>Large magnitude of effect</b>    | The rating was upgraded if modeling suggested that confounding alone was unlikely to explain associations that were judged to be of large magnitude.                                                                                                                                                                                |
| <b>Dose response</b>                | Upgraded if consistent relationship between dose and response in one or multiple studies, and/or the dose response across studies.                                                                                                                                                                                                  |
| <b>Confounding minimizes effect</b> | Upgraded if the consideration of all plausible residual confounders or biases would underestimate the effect or suggest a spurious effect when results show no effect.                                                                                                                                                              |

Figure S1: Forest plot of each study investigating the association between low temperature and cardiovascular disease mortality, with every 1°C decrease in temperature.

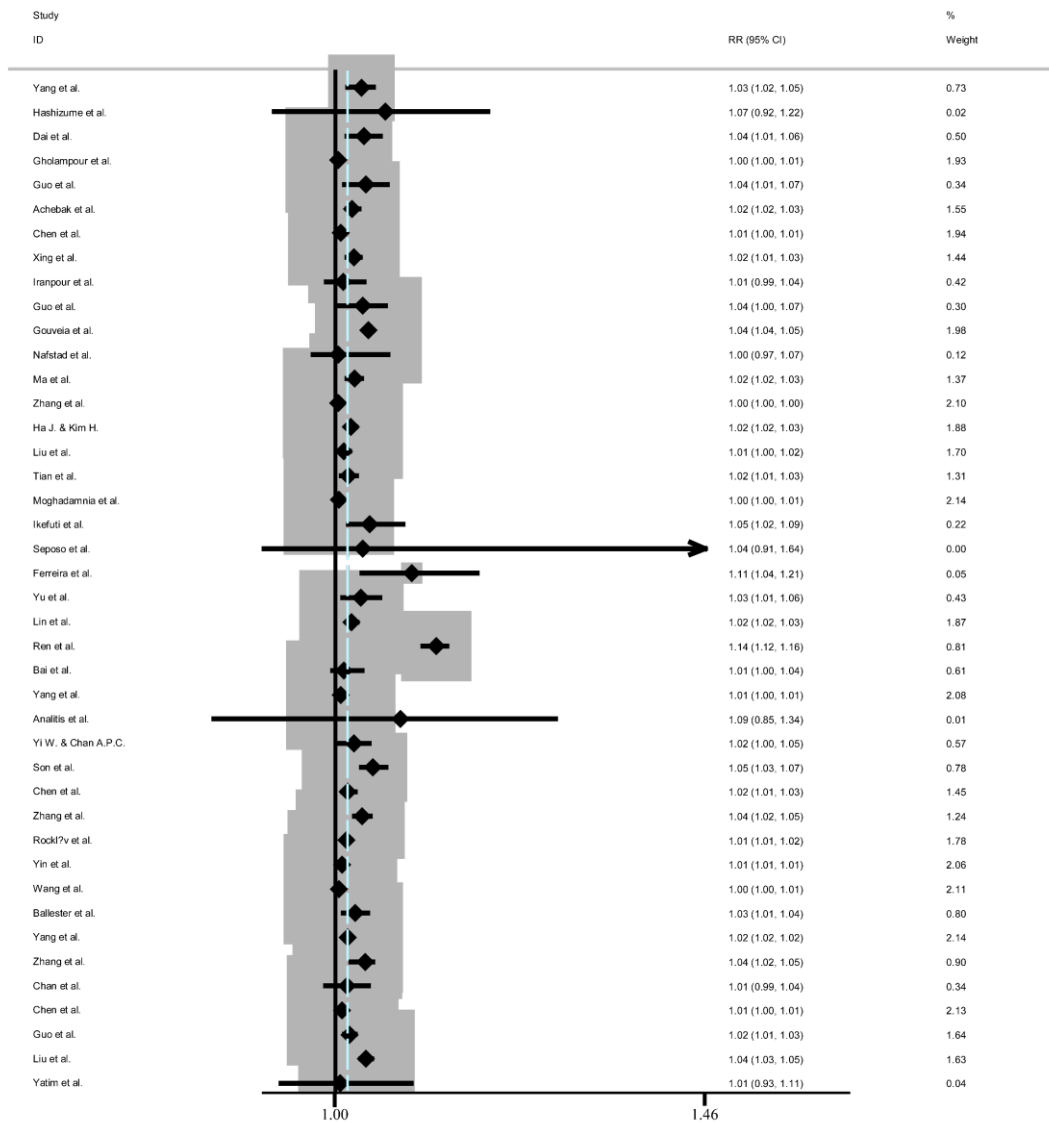



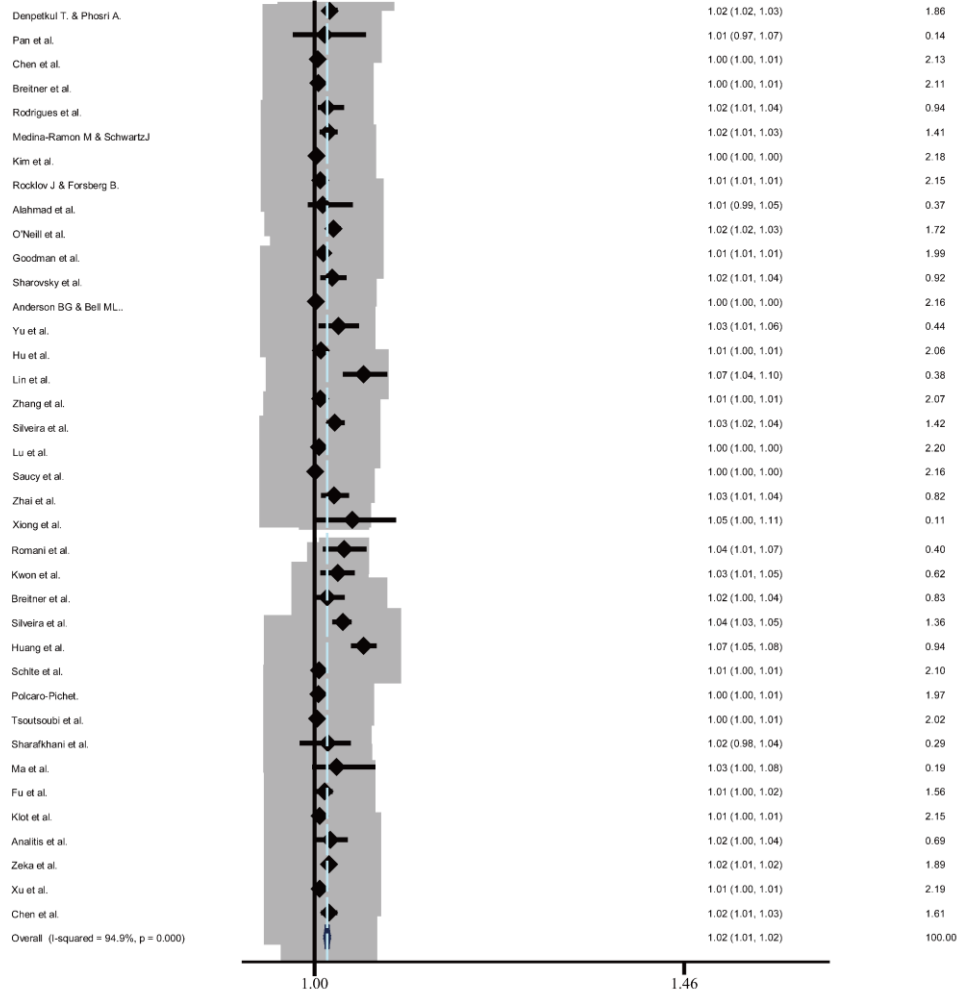

Figure S2: Forest plot of each study investigating the association between low temperature and cardiovascular disease morbidity, with every 1°C decrease in temperature.

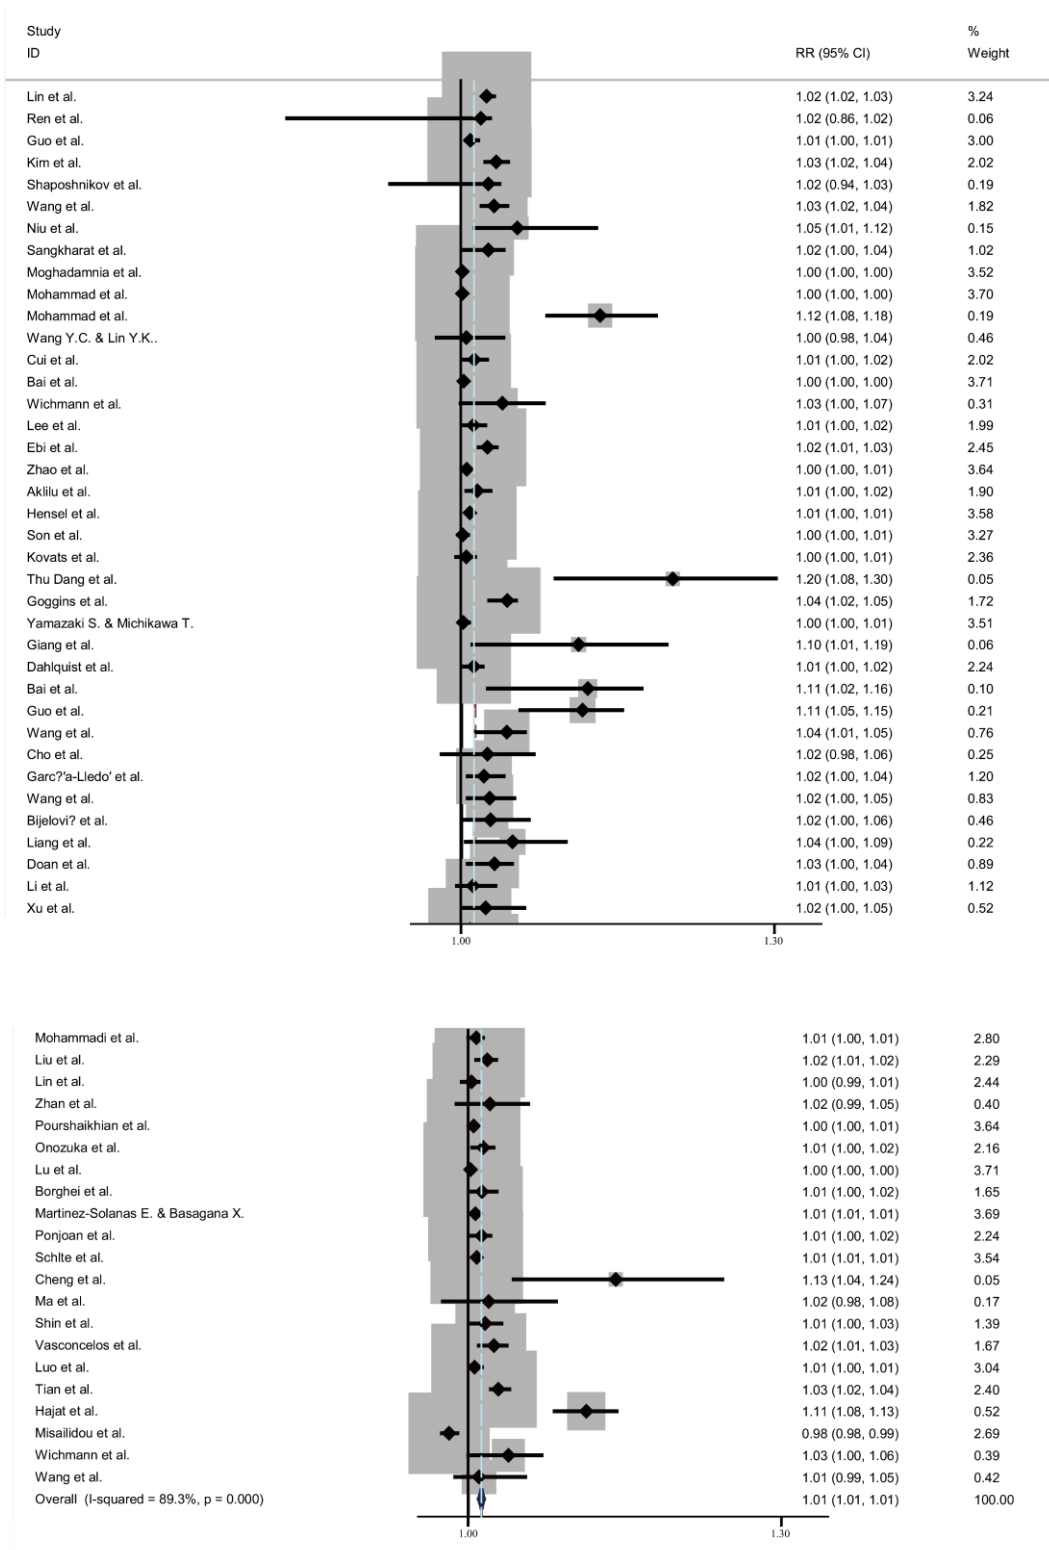

Figure S3: Forest plot of each study investigating the association between cold spells and cardiovascular disease mortality.

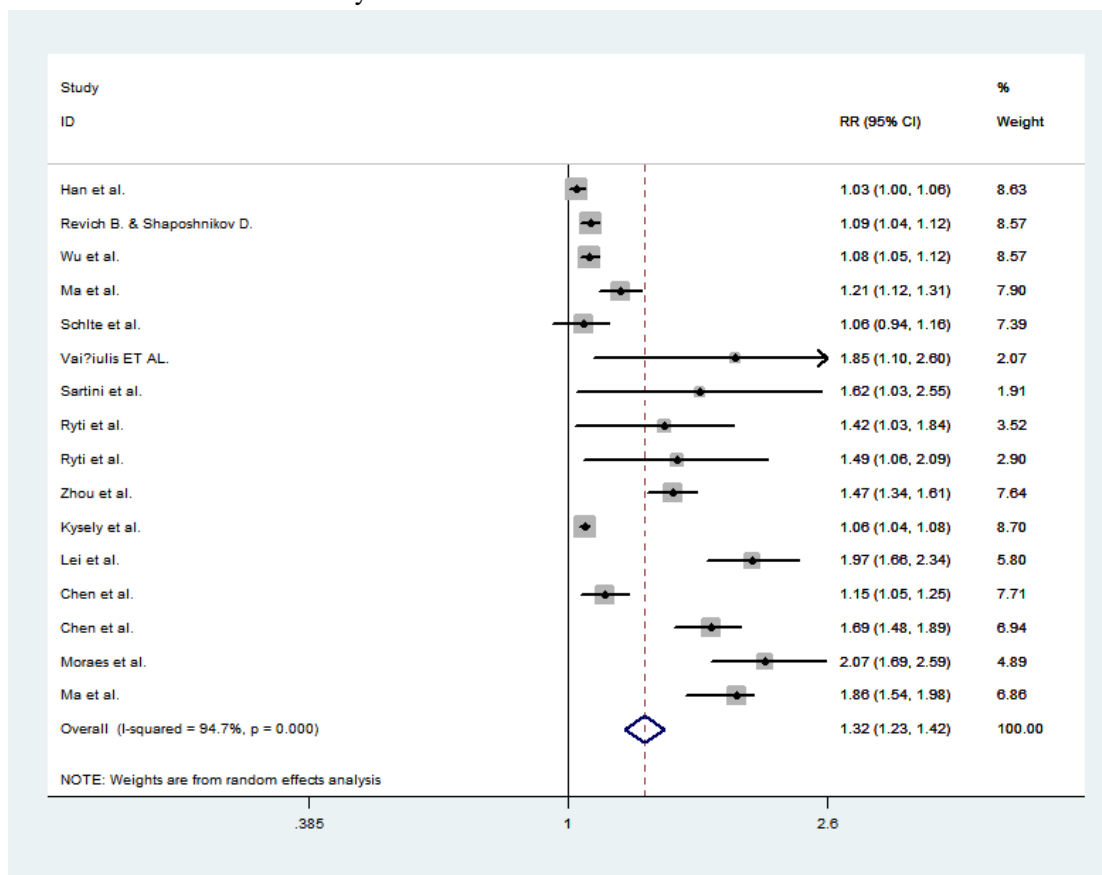

Figure S4: Forest plot of each study investigating the association between cold spells and cardiovascular disease morbidity.

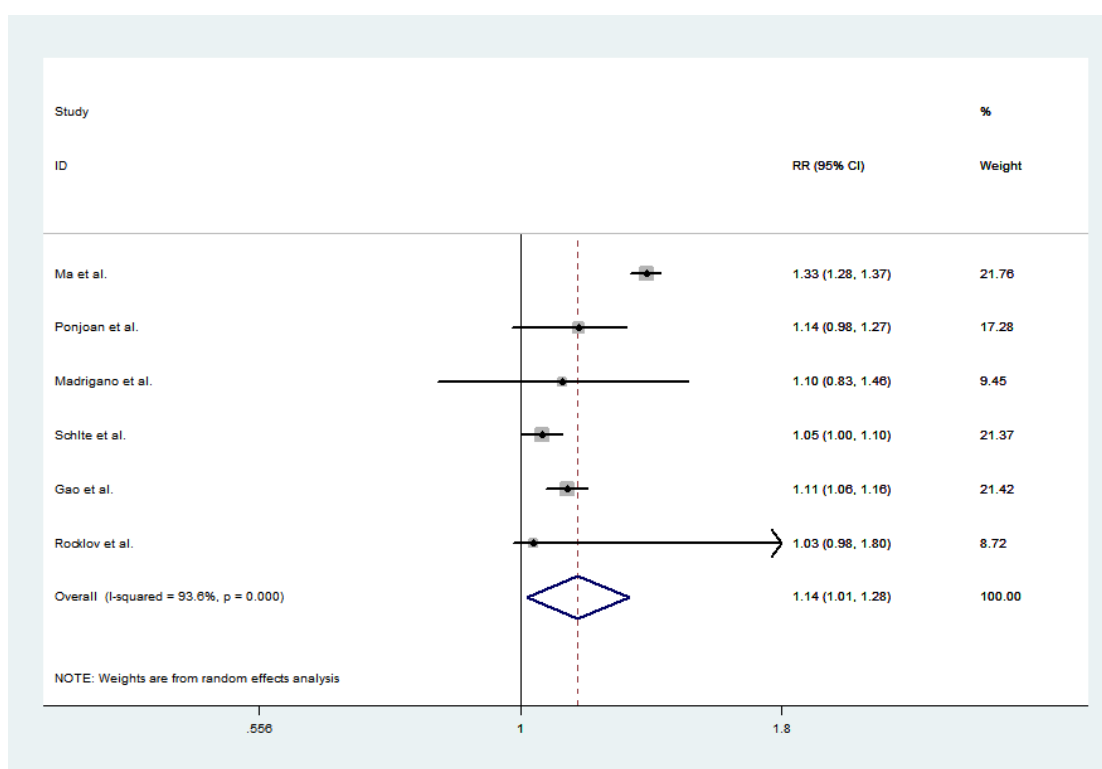

Table S6: Meta-regression model investigating the predictors of log pooled effect sizes for the associations between low temperatures and cardiovascular mortality and morbidity.

| Regressors                                       | Mortality, $\beta$ (95% CIs.)                   |
|--------------------------------------------------|-------------------------------------------------|
| <b>Climate zone (ref = Group A-Tropical)</b>     |                                                 |
| Group B-Dry                                      | 1.005(0.956-1.057)                              |
| Group C-Mediterranean                            | 1.011 (0.967-1.056)                             |
| Group C-Oceanic                                  | 1.021 (0.981-1.063)                             |
| Group C-Subtropical                              | 1.013 (0.989-1.038)                             |
| Group D-Continental                              | 1.014 (0.987-1.042)                             |
| Group E-Subarctic                                | 1.002 (0.954-1.053)                             |
| <b>National income level (ref = high income)</b> |                                                 |
| Upper-middle income                              | 0.993 (0.974-1.014)                             |
| Lower-middle income                              | 1.124 (1.035-1.221)*                            |
| Annual mean temperature                          | 1.000 (0.998-1.002)                             |
| Latitude                                         | 1.000 (1.000-1.000)                             |
| Longitude                                        | 1.000 (1.000-1.000)                             |
| Constant                                         | 1.013 (0.944-1.086)                             |
|                                                  |                                                 |
| <b>Regressors</b>                                | <b>Morbidity, <math>\beta</math> (95% CIs.)</b> |
| <b>Climate zone (ref = Group E-Subarctic)</b>    |                                                 |
| Group B-Dry                                      | 1.005 (0.956-1.057)                             |
| Group C-Mediterranean                            | 1.020 (0.976-1.067)                             |
| Group C-Oceanic                                  | 1.021 (0.981-1.063)                             |
| Group C-Subtropical                              | 1.013(0.989-1.038)                              |
| Group D-Continental                              | 1.014 (0.987-1.042)                             |
| <b>National income level (ref = high income)</b> |                                                 |
| Upper-middle income                              | 0.993 (0.974-1.014)                             |
| Lower-middle income                              | 1.124 (1.035-1.221)*                            |
| Annual mean temperature                          | 1.000 (0.998-1.002)                             |
| Latitude                                         | 1.000 (1.000-1.000)                             |
| Longitude                                        | 1.000 (1.000-1.000)                             |
| Constant                                         | 1.012 (0.944-1.086)                             |

\*, statistically significant (p-value<0.05). 95% CI, 95% Confidence interval.

Table S7: Meta-regression testing for differences between subgroups for the associations between cold spells and cardiovascular mortality and morbidity.

| Subgroups                                   | Mortality (p-value) | Morbidity (p-value) |
|---------------------------------------------|---------------------|---------------------|
| <b>National income (ref=high income)</b>    |                     |                     |
| Upper-middle-income                         | 0.49                | 0.14                |
| <b>Climate zone (ref=Group E-subarctic)</b> |                     |                     |
| Group C-Ocean                               | 0.99                | ..                  |
| Group C-Subtropical                         | 0.99                | 0.25                |

|                                           |      |      |
|-------------------------------------------|------|------|
| Group C-Continual                         | 0.97 | 0.89 |
| Cold spell intensity (ref=high intensity) |      |      |
| Middle intensity                          | 0.99 | 0.45 |
| Low intensity                             | 0.89 | ..   |

Figure S5: Risk of bias assessment of individual studies.

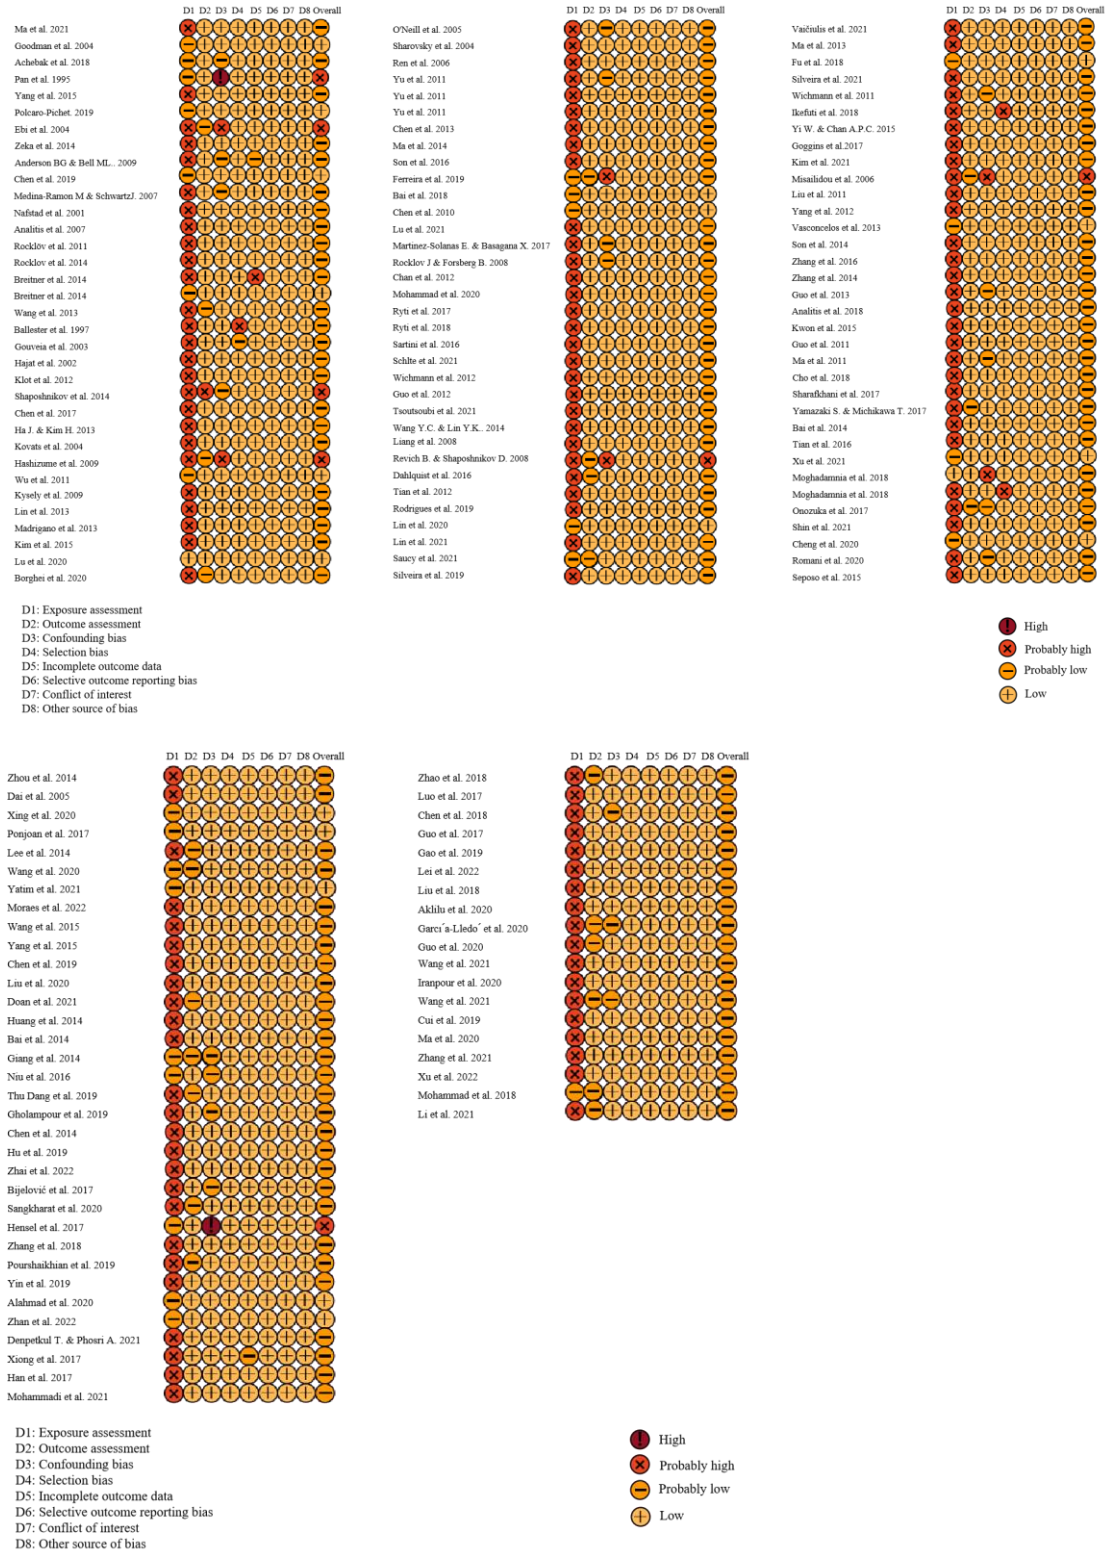

Figure S6: Weighted bar plots of the risk of bias assessment of included studies on low temperatures and cardiovascular disease mortality (A), low temperatures and cardiovascular disease morbidity (B), cold spells and cardiovascular mortality (C), and cold spells and cardiovascular morbidity (D).

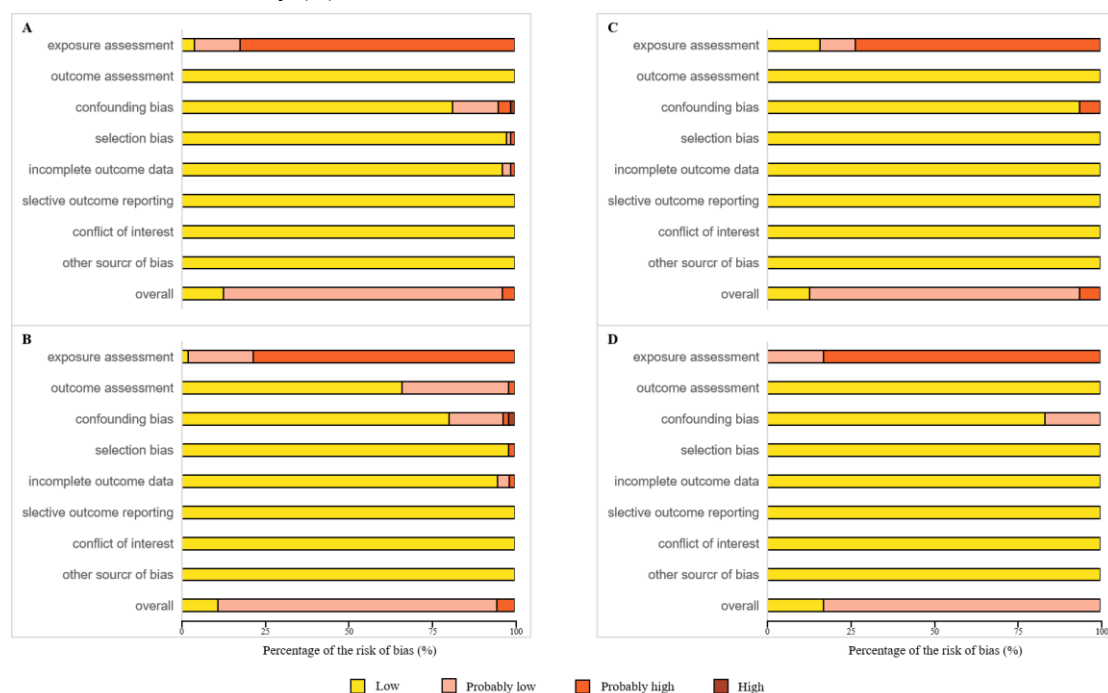

Table S8: Rating of quality and strength of the body of evidence of influence of low temperature and cold spells on cardiovascular mortality and morbidity.

|                                       | Low temperature studies |               | Cold spell studies |               |
|---------------------------------------|-------------------------|---------------|--------------------|---------------|
|                                       | Mortality               | morbidity     | Mortality          | morbidity     |
| <b>Quality of evidence assessment</b> |                         |               |                    |               |
| <b>Downgrade</b>                      |                         |               |                    |               |
|                                       | <b>Rating</b>           | <b>Rating</b> | <b>Rating</b>      | <b>Rating</b> |
| <b>-Risk of bias across studies</b>   | (0)                     | (0)           | (0)                | (0)           |
| <b>-Indirectness</b>                  | (0)                     | (0)           | (0)                | (0)           |
| <b>-Inconsistency</b>                 | (-1)                    | (-1)          | (-1)               | (-1)          |
| <b>-Imprecision</b>                   | (0)                     | (0)           | (0)                | (0)           |
| <b>-Publication Bias</b>              | (0)                     | (0)           | (0)                | (0)           |
| <b>Upgrade</b>                        |                         |               |                    |               |
| <b>-Large magnitude of effect</b>     | (0)                     | (0)           | (0)                | (0)           |

|                                                             |          |          |          |     |
|-------------------------------------------------------------|----------|----------|----------|-----|
|                                                             |          |          |          |     |
| -Dose response                                              | (+1)     | (+1)     | (+1)     | (0) |
| -Confounding minimizes the effect                           | (0)      | (0)      | (0)      | (0) |
| <b>Summary of the quality assessment</b>                    |          |          |          |     |
| -Overall quality of evidence (initial rating is "moderate") | Moderate | Moderate | Moderate | Low |

Figure S7: Funnel plots to explore publication bias for studies investigating the association between low temperature and cardiovascular mortality.

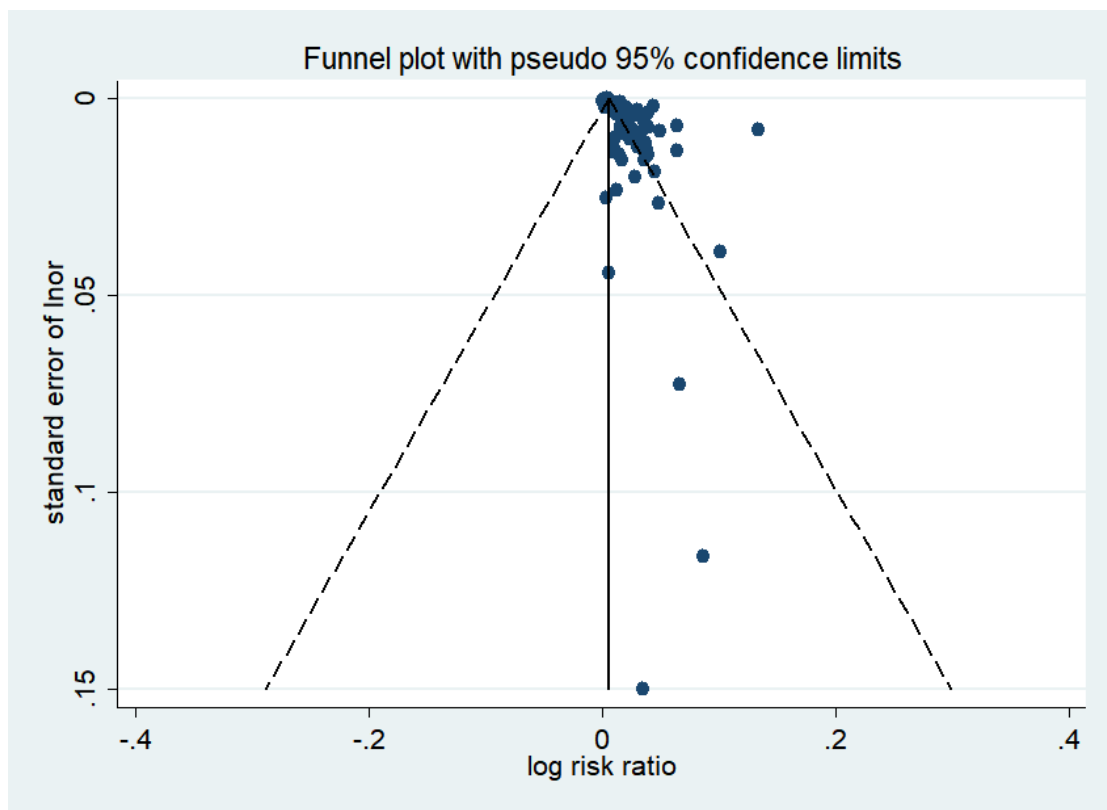

Figure S8: Funnel plots to explore publication bias for studies investigating the association between low temperature and cardiovascular morbidity.

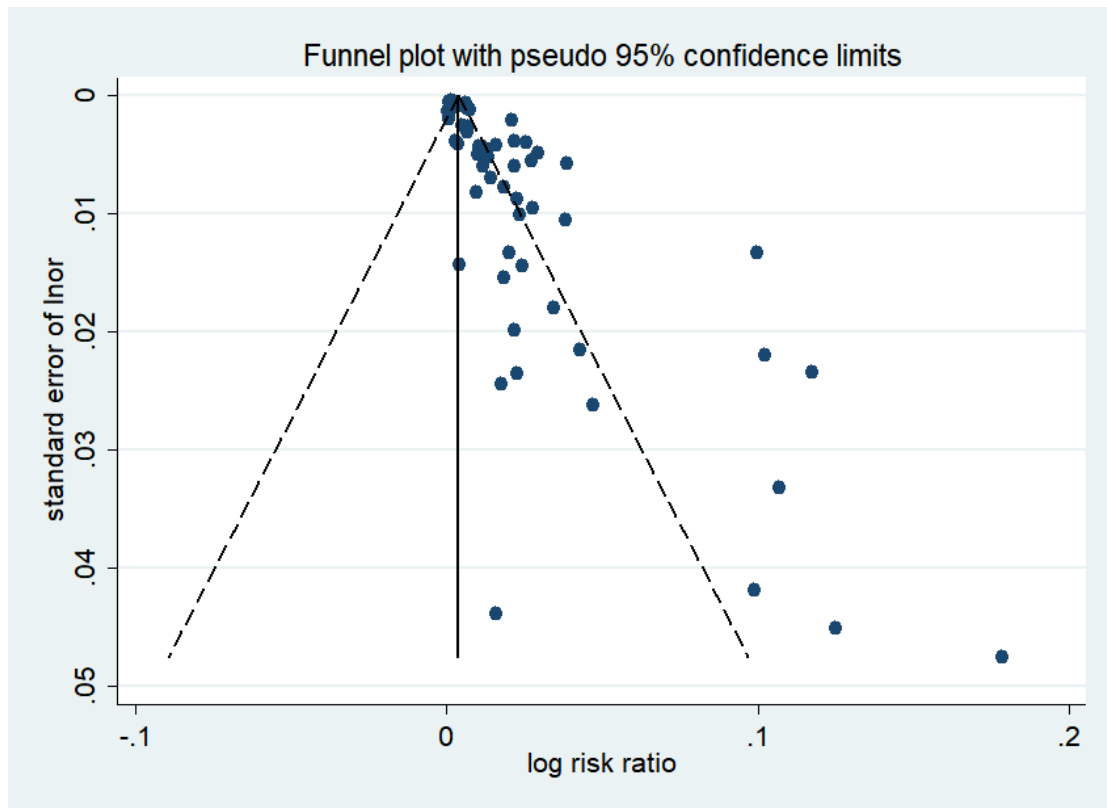

Figure S9: Funnel plots to explore publication bias for studies investigating the association between cold spells and cardiovascular mortality.



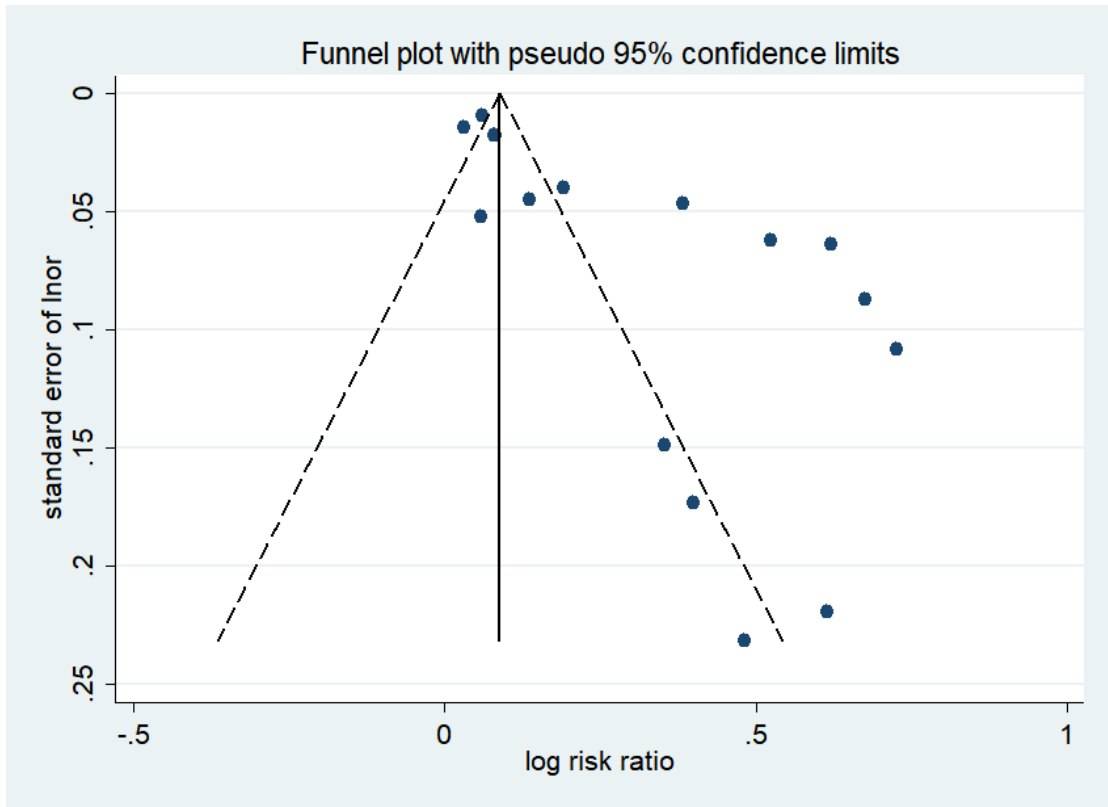

Figure S10: Funnel plots to explore publication bias for studies investigating the association between cold spells and cardiovascular morbidity.

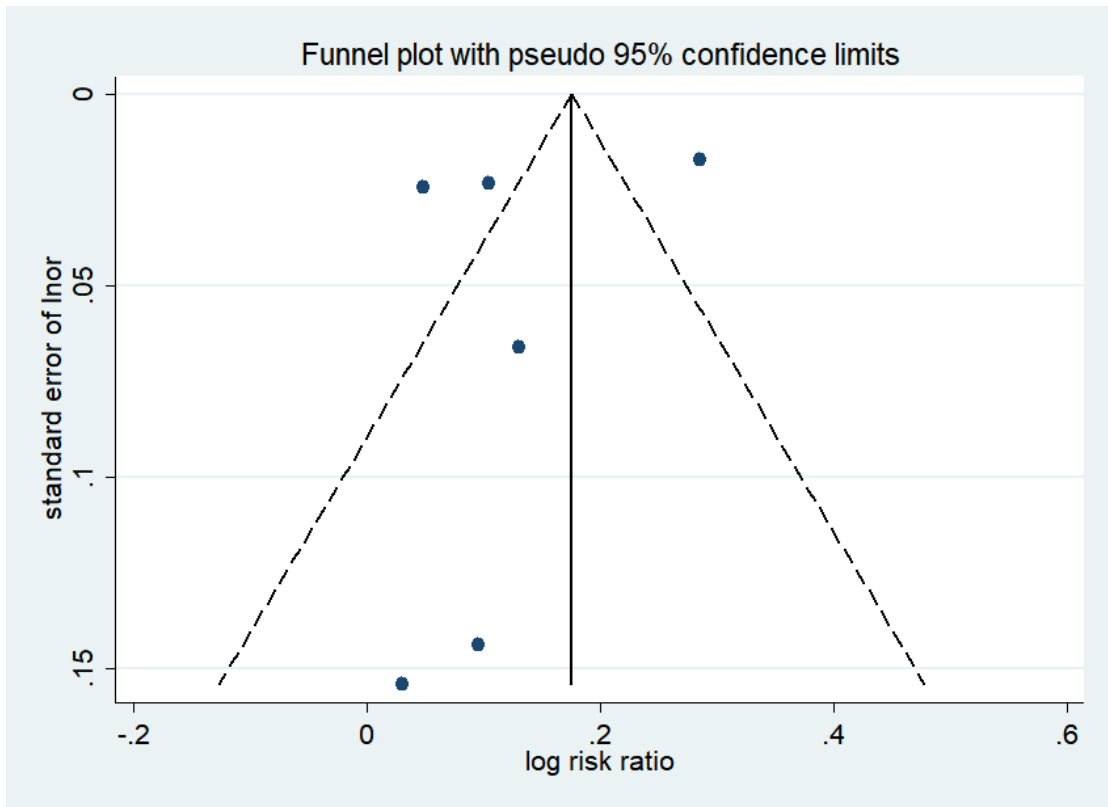

Figure S11: Trim and fill analysis of the studies investigating the association between low temperature and cardiovascular mortality.

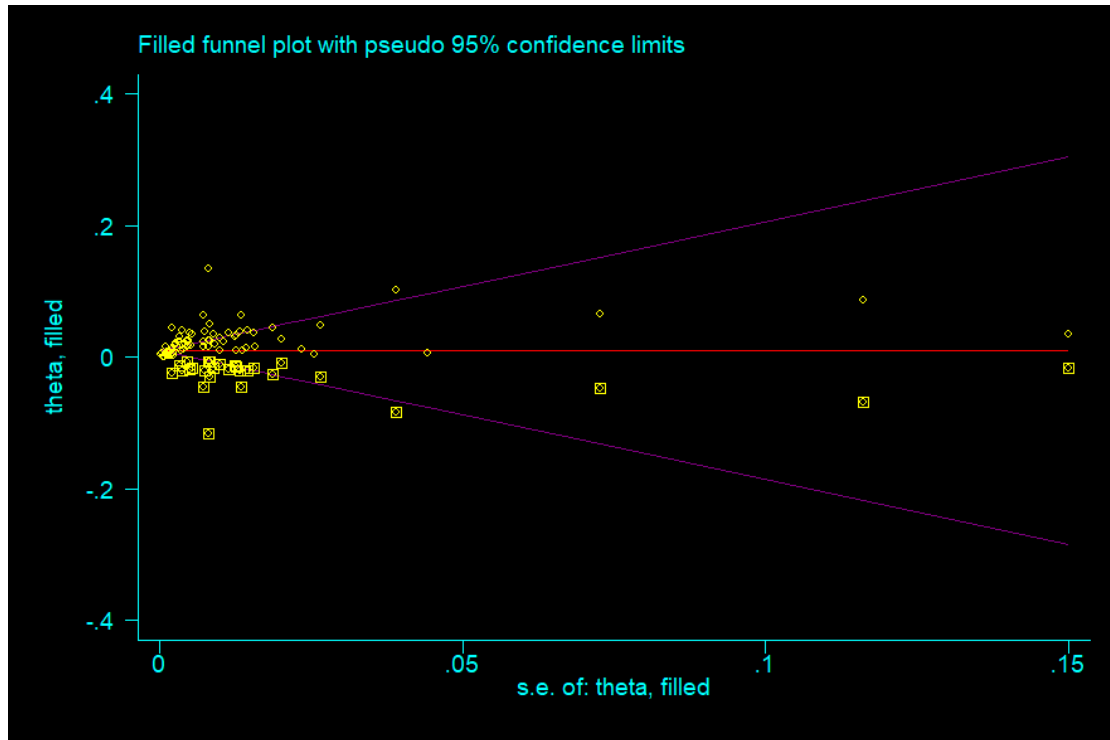

Figure S12: Trim and fill analysis of the studies investigating the association between low temperature and cardiovascular morbidity.

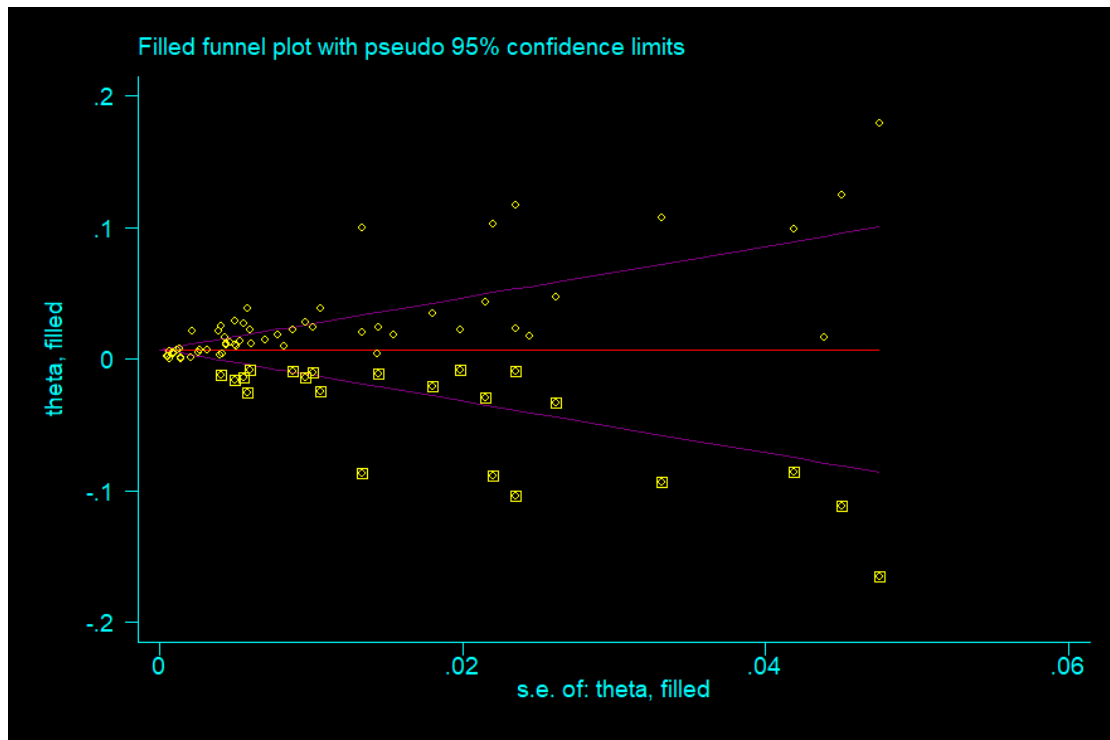

Figure S13: Trim and fill analysis of the studies investigating the association between cold spells and cardiovascular mortality.

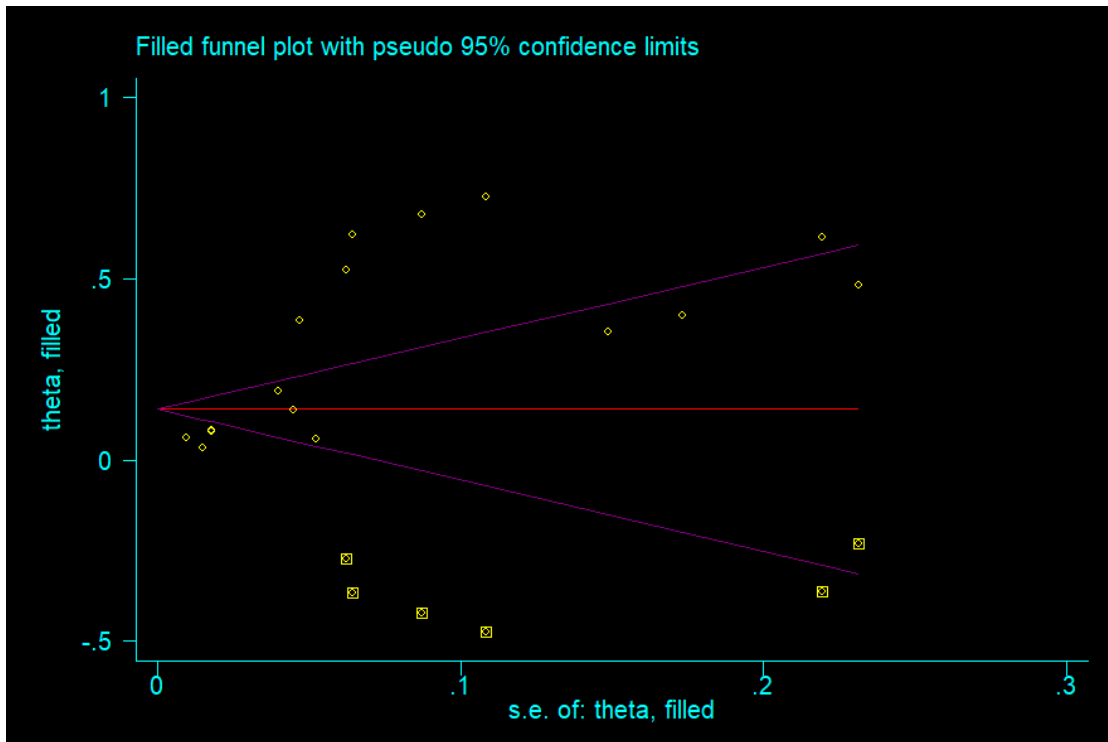

Figure S14: Trim and fill analysis of the studies investigating the association between cold spells and cardiovascular morbidity.

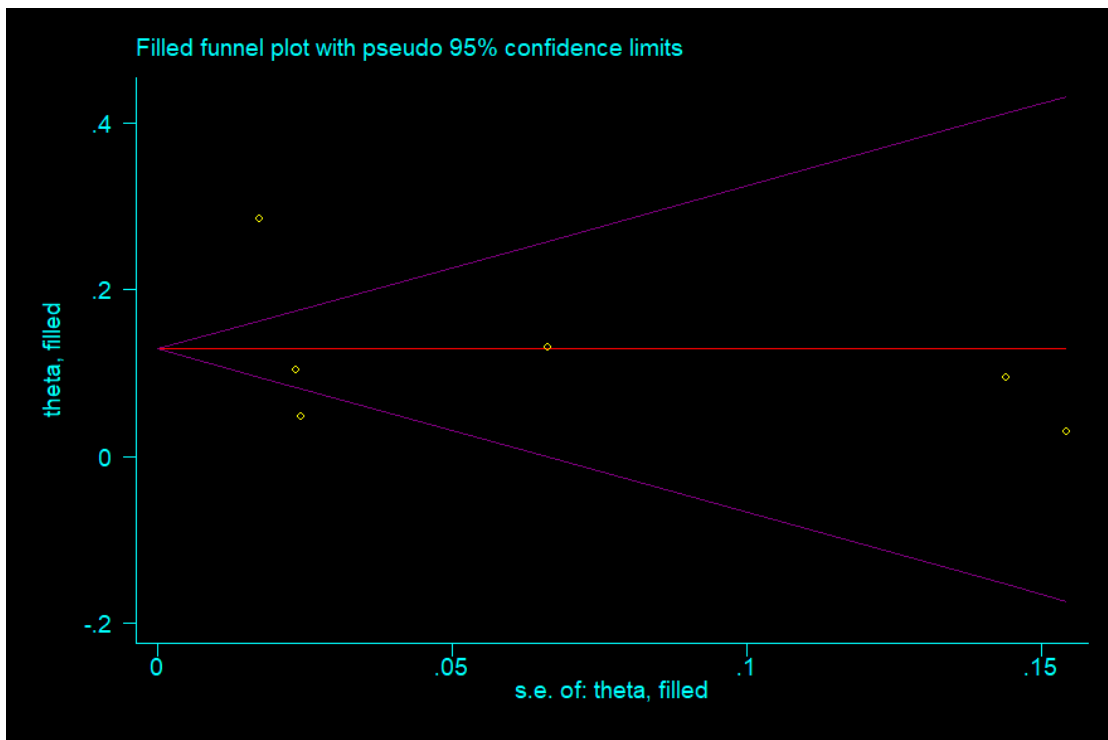

Table S9 Definition of cold spell across studies

| Authors | Study Period | Cold Spell Definition |
|---------|--------------|-----------------------|
|---------|--------------|-----------------------|

|                             |           |                                 |
|-----------------------------|-----------|---------------------------------|
| Ma et al.                   | 1972-2015 | 2d, meanT< 5nd                  |
| Rocklov et al.              | 1990-2002 | 2d, meanT<2nd                   |
| Wu et al.                   | 1994-2003 | 24h, minT< 10°C                 |
| Kysely et al.               | 1994-2006 | 10d, MaxT< 3.5°C                |
| Madrigano et al.            | 1995-2003 | 3d, mimT< 5th                   |
| Chen et al.                 | 1997-2003 | 24h, minT< 10°C                 |
| Ryti et al.                 | 1998-2011 | 3d, mimT< 5th                   |
| Ryti et al.                 | 1998-2011 | 3d, mimT< 5th                   |
| Sartini et al.              | 1998-2012 | 3D, mimT< 10th                  |
| Revich B. & Shaposhnikov D. | 2000-2006 | 9d, meanT<3th OR 6d, meanT <1st |
| Vaičiulis ET AL.            | 2000-2015 | 2d, meanT<10th                  |
| Ma et al.                   | 2001-2009 | 7d, MaxT< 3rd                   |
| Ma et al.                   | 2005-2008 | 7d, MaxT< 3rd                   |
| Zhou et al.                 | 2006-2010 | 3d, mimT< 5th                   |
| Ponjoan et al.              | 2006-2013 | 9d, meanT<5th                   |
| Moraes et al.               | 2006-2015 | 4d, minT< 3nd                   |
| Chen et al.                 | 2007-2013 | 2d, meanT< 3nd                  |
| Han et al.                  | 2011-2014 | 3d, mimT< 5th                   |
| Gao et al.                  | 2013-2015 | 3d, mimT< 5th                   |

## Reference

1. Page MJ, McKenzie JE, Bossuyt PM, Boutron I, Hoffmann TC, Mulrow CD, et al. The PRISMA 2020 statement: an updated guideline for reporting systematic reviews. *Rev Esp Cardiol (Engl Ed)* 2021; 74:790-799.
2. Chen R, Yin P, Wang L, Liu C, Niu Y, Wang W, et al. Association between ambient temperature and mortality risk and burden: time series study in 272 main Chinese cities. *Bmj* 2018; 363:k4306.
3. Ma C, Yang J, Nakayama SF, Iwai-Shimada M, Jung CR, Sun XL, et al. Cold Spells and Cause-Specific Mortality in 47 Japanese Prefectures: A Systematic Evaluation. *Environ Health Perspect* 2021; 129:67001.
4. Guo Y, Li S, Zhang Y, Armstrong B, Jaakkola JJ, Tong S, et al. Extremely cold and hot temperatures increase the risk of ischaemic heart disease mortality: epidemiological evidence from China. *Heart* 2013; 99:195-203.
5. Ren C, Williams GM, Tong S. Does particulate matter modify the association between temperature and cardiorespiratory diseases? *Environ Health Perspect* 2006; 114:1690-1696.
6. Bai L, Cirendunzhu, Woodward A, Dawa, Xiraoruodeng, Liu Q. Temperature and mortality on the roof of the world: a time-series analysis in three Tibetan counties, China. *Sci Total Environ* 2014; 485-486:41-48.
7. Ha J, Kim H. Changes in the association between summer temperature and mortality in Seoul, South Korea. *Int J Biometeorol* 2013; 57:535-544
8. Ferreira LCM, Nogueira MC, Pereira RVB, de Farias WCM, Rodrigues MMS, Teixeira MTB, et al. Ambient temperature and mortality due to acute myocardial infarction in Brazil: an ecological study of time-series analyses. *Sci Rep* 2019; 9:13790.
9. Analitis A, De' Donato F, Scortichini M, Lanki T, Basagana X, Ballester F, et al. Synergistic Effects of

Ambient Temperature and Air Pollution on Health in Europe: Results from the PHASE Project. *Int J Environ Res Public Health* 2018; 15.

10. Hashizume M, Wagatsuma Y, Hayashi T, Saha SK, Streatfield K, Yunus M. The effect of temperature on mortality in rural Bangladesh—a population-based time-series study. *Int J Epidemiol* 2009; 38:1689-1697.

11. Huang J, Wang J, Yu W. The lag effects and vulnerabilities of temperature effects on cardiovascular disease mortality in a subtropical climate zone in China. *Int J Environ Res Public Health* 2014; 11:3982-3994.

12. Lin YK, Chang CK, Wang YC, Ho TJ. Acute and prolonged adverse effects of temperature on mortality from cardiovascular diseases. *PLoS One* 2013; 8:e82678.

13. Son JY, Gouveia N, Bravo MA, de Freitas CU, Bell ML. The impact of temperature on mortality in a subtropical city: effects of cold, heat, and heat waves in Sao Paulo, Brazil. *Int J Biometeorol* 2016; 60:113-121.

14. Xiong J, Lan L, Lian Z, Lin Y. Effect of different temperatures on hospital admissions for cardiovascular and cerebrovascular diseases: A case study. *Indoor and Built Environment* 2015; 26:69-77.

15. Ikefuti PV, Barrozo LV, Braga ALF. Mean air temperature as a risk factor for stroke mortality in Sao Paulo, Brazil. *Int J Biometeorol* 2018; 62:1535-1542.

16. Gouveia N, Hajat S, Armstrong B. Socioeconomic differentials in the temperature-mortality relationship in Sao Paulo, Brazil. *Int J Epidemiol* 2003; 32:390-397.

17. Liu S, Chan EYY, Goggins WB, Huang Z. The Mortality Risk and Socioeconomic Vulnerability Associated with High and Low Temperature in Hong Kong. *Int J Environ Res Public Health* 2020; 17.

18. Guo Y, Barnett AG, Pan X, Yu W, Tong S. The impact of temperature on mortality in Tianjin, China: a case-crossover design with a distributed lag nonlinear model. *Environ Health Perspect* 2011; 119:1719-1725.

19. Zhang Y, Li S, Pan X, Tong S, Jaakkola JJ, Gasparrini A, et al. The effects of ambient temperature on cerebrovascular mortality: an epidemiologic study in four climatic zones in China. *Environ Health* 2014; 13:24.

20. Romani SG, Roye D, Sanchez Santos L, Figueiras A. Impact of Extreme Temperatures on Ambulance Dispatches Due to Cardiovascular Causes in North-West Spain. *Int J Environ Res Public Health* 2020; 17.

21. Dai J, Chen R, Meng X, Yang C, Zhao Z, Kan H. Ambient air pollution, temperature and out-of-hospital coronary deaths in Shanghai, China. *Environ Pollut* 2015; 203:116-121.

22. Silveira IH, Oliveira BFA, Cortes TR, Junger WL. The effect of ambient temperature on cardiovascular mortality in 27 Brazilian cities. *Sci Total Environ* 2019; 691:996-1004.

23. Guo Y, Punnasiri K, Tong S. Effects of temperature on mortality in Chiang Mai city, Thailand: a time series study. *Environ Health* 2012; 11:36.

24. Seposo XT, Dang TN, Honda Y. Evaluating the Effects of Temperature on Mortality in Manila City (Philippines) from 2006-2010 Using a Distributed Lag Nonlinear Model. *Int J Environ Res Public Health* 2015; 12:6842-6857.

25. Zhang Y, Li C, Feng R, Zhu Y, Wu K, Tan X, et al. The Short-Term Effect of Ambient Temperature on Mortality in Wuhan, China: A Time-Series Study Using a Distributed Lag Non-Linear Model. *Int J Environ Res Public Health* 2016; 13.

26. Yang J, Ou CQ, Ding Y, Zhou YX, Chen PY. Daily temperature and mortality: a study of distributed lag

- non-linear effect and effect modification in Guangzhou. *Environ Health* 2012; 11:63.
27. Yu W, Mengersen K, Hu W, Guo Y, Pan X, Tong S. Assessing the relationship between global warming and mortality: lag effects of temperature fluctuations by age and mortality categories. *Environ Pollut* 2011; 159:1789-1793.
  28. Yu W, Hu W, Mengersen K, Guo Y, Pan X, Connell D, et al. Time course of temperature effects on cardiovascular mortality in Brisbane, Australia. *Heart* 2011; 97:1089-1093.
  29. Kwon BY, Lee E, Lee S, Heo S, Jo K, Kim J, et al. Vulnerabilities to Temperature Effects on Acute Myocardial Infarction Hospital Admissions in South Korea. *Int J Environ Res Public Health* 2015; 12:14571-14588.
  30. Ma Y, Zhou L, Chen K. Burden of cause-specific mortality attributable to heat and cold: A multicity time-series study in Jiangsu Province, China. *Environ Int* 2020; 144:105994.
  31. Ballester F, Corella D, Perez-Hoyos S, Saez M, Hervas A. Mortality as a function of temperature. A study in Valencia, Spain, 1991-1993. *Int J Epidemiol* 1997; 26:551-561.
  32. Silveira IH, Cortes TR, Oliveira BFA, Junger WL. Temperature and cardiovascular mortality in Rio de Janeiro, Brazil: effect modification by individual-level and neighbourhood-level factors. *J Epidemiol Community Health* 2021; 75:69-75.
  33. Zhai L, Ma X, Wang J, Luan G, Zhang H. Effects of ambient temperature on cardiovascular disease: a time-series analysis of 229288 deaths during 2009-2017 in Qingdao, China. *Int J Environ Health Res* 2022; 32:181-190.
  34. Ma W, Chen R, Kan H. Temperature-related mortality in 17 large Chinese cities: how heat and cold affect mortality in China. *Environ Res* 2014; 134:127-133.
  35. O'Neill MS, Hajat S, Zanobetti A, Ramirez-Aguilar M, Schwartz J. Impact of control for air pollution and respiratory epidemics on the estimated associations of temperature and daily mortality. *Int J Biometeorol* 2005; 50:121-129.
  36. Yi W, Chan AP. Effects of temperature on mortality in Hong Kong: a time series analysis. *Int J Biometeorol* 2015; 59:927-936.
  37. Xing Q, Sun Z, Tao Y, Zhang X, Miao S, Zheng C, et al. Impacts of urbanization on the temperature-cardiovascular mortality relationship in Beijing, China. *Environ Res* 2020; 191:110234.
  38. Sharovsky R, Cesar LA, Ramires JA. Temperature, air pollution, and mortality from myocardial infarction in Sao Paulo, Brazil. *Braz J Med Biol Res* 2004; 37:1651-1657.
  39. Lin YK, Sung FC, Honda Y, Chen YJ, Wang YC. Comparative assessments of mortality from and morbidity of circulatory diseases in association with extreme temperatures. *Sci Total Environ* 2020; 723:138012.
  40. Analitis A, Katsouyanni K, Biggeri A, Baccini M, Forsberg B, Bisanti L, et al. Effects of cold weather on mortality: results from 15 European cities within the PHEWE project. *Am J Epidemiol* 2008; 168:1397-1408.
  41. Denpetkul T, Phosri A. Daily ambient temperature and mortality in Thailand: Estimated effects, attributable risks, and effect modifications by greenness. *Sci Total Environ* 2021; 791:148373.
  42. Chen TH, Li X, Zhao J, Zhang K. Impacts of cold weather on all-cause and cause-specific mortality in Texas, 1990-2011. *Environ Pollut* 2017; 225:244-251.
  43. Antunes L, Silva SP, Marques J, Nunes B, Antunes S. The effect of extreme cold temperatures on the risk of death in the two major Portuguese cities. *Int J Biometeorol* 2017; 61:127-135.
  44. Medina-Ramon M, Schwartz J. Temperature, temperature extremes, and mortality: a study of acclimatisation and effect modification in 50 US cities. *Occup Environ Med* 2007; 64:827-833.

45. Tian Z, Li S, Zhang J, Jaakkola JJ, Guo Y. Ambient temperature and coronary heart disease mortality in Beijing, China: a time series study. *Environ Health* 2012; 11:56.
46. Sharafkhani R, Khanjani N, Bakhtiari B, Jahani Y, Entezar Mahdi R. Diurnal temperature range and mortality in Urmia, the Northwest of Iran. *J Therm Biol* 2017; 69:281-287.
47. Pan WH, Li LA, Tsai MJ. Temperature extremes and mortality from coronary heart disease and cerebral infarction in elderly Chinese. *Lancet* 1995; 345:353-355.
48. Yang C, Meng X, Chen R, Cai J, Zhao Z, Wan Y, et al. Long-term variations in the association between ambient temperature and daily cardiovascular mortality in Shanghai, China. *Sci Total Environ* 2015; 538:524-530.
49. Breitner S, Wolf K, Devlin RB, Diaz-Sanchez D, Peters A, Schneider A. Short-term effects of air temperature on mortality and effect modification by air pollution in three cities of Bavaria, Germany: a time-series analysis. *Sci Total Environ* 2014; 485-486:49-61.
50. Rodrigues M, Santana P, Rocha A. Effects of extreme temperatures on cerebrovascular mortality in Lisbon: a distributed lag non-linear model. *Int J Biometeorol* 2019; 63:549-559.
51. Chen R, Li T, Cai J, Yan M, Zhao Z, Kan H. Extreme temperatures and out-of-hospital coronary deaths in six large Chinese cities. *J Epidemiol Community Health* 2014; 68:1119-1124.
52. Chan EY, Goggins WB, Kim JJ, Griffiths SM. A study of intracity variation of temperature-related mortality and socioeconomic status among the Chinese population in Hong Kong. *J Epidemiol Community Health* 2012; 66:322-327.
53. Rocklöv J, Ebi K, Forsberg B. Mortality related to temperature and persistent extreme temperatures: a study of cause-specific and age-stratified mortality. *Occup Environ Med* 2011; 68:531-536.
54. Fu SH, Gasparrini A, Rodriguez PS, Jha P. Mortality attributable to hot and cold ambient temperatures in India: a nationally representative case-crossover study. *PLoS Med* 2018; 15:e1002619.
55. Goodman PG, Dockery DW, Clancy L. Cause-specific mortality and the extended effects of particulate pollution and temperature exposure. *Environ Health Perspect* 2004; 112:179-185.
56. Liu L, Breitner S, Pan X, Franck U, Leitte AM, Wiedensohler A, et al. Associations between air temperature and cardio-respiratory mortality in the urban area of Beijing, China: a time-series analysis. *Environ Health* 2011; 10:51.
57. Alahmad B, Shakarchi AF, Khraishah H, Alseaidan M, Gasana J, Al-Hemoud A, et al. Extreme temperatures and mortality in Kuwait: Who is vulnerable? *Sci Total Environ* 2020; 732:139289.
58. Iranpour S, Khodakarim S, Shahsavani A, Khosravi A, Etemad K. Modification of the effect of ambient air temperature on cardiovascular and respiratory mortality by air pollution in Ahvaz, Iran. *Epidemiol Health* 2020; 42:e2020053.
59. Yin Q, Wang J, Su J, Wei Z. A new method to estimate the temperature-CVD mortality relationship. *Environ Sci Pollut Res Int* 2019; 26:8895-8901.
60. Hu K, Guo Y, Hochrainer-Stigler S, Liu W, See L, Yang X, et al. Evidence for Urban-Rural Disparity in Temperature-Mortality Relationships in Zhejiang Province, China. *Environ Health Perspect* 2019; 127:37001.
61. Yang J, Yin P, Zhou M, Ou CQ, Guo Y, Gasparrini A, et al. Cardiovascular mortality risk attributable to ambient temperature in China. *Heart* 2015; 101:1966-1972.
62. Chen R, Wang C, Meng X, Chen H, Thach TQ, Wong CM, et al. Both low and high temperature may increase the risk of stroke mortality. *Neurology* 2013; 81:1064-1070.
63. Zhang W, Du G, Xiong L, Liu T, Zheng Z, Yuan Q, et al. Extreme temperatures and cardiovascular

mortality: assessing effect modification by subgroups in Ganzhou, China. *Glob Health Action* 2021; 14:1965305.

64. Rocklov J, Forsberg B. The effect of temperature on mortality in Stockholm 1998--2003: a study of lag structures and heatwave effects. *Scand J Public Health* 2008; 36:516-523.

65. Yatim ANM, Latif MT, Sofwan NM, Ahamad F, Khan MF, Mahiyuddin WRW, et al. The association between temperature and cause-specific mortality in the Klang Valley, Malaysia. *Environ Sci Pollut Res Int* 2021; 28:60209-60220.

66. Xu R, Shi C, Wei J, Lu W, Li Y, Liu T, et al. Cause-specific cardiovascular disease mortality attributable to ambient temperature: A time-stratified case-crossover study in Jiangsu province, China. *Ecotoxicol Environ Saf* 2022; 236:113498.

67. Schulte F, Roosli M, Ragettli MS. Heat-related cardiovascular morbidity and mortality in Switzerland: a clinical perspective. *Swiss Med Wkly* 2021; 151:w30013.

68. Lu P, Xia G, Zhao Q, Xu R, Li S, Guo Y. Temporal trends of the association between ambient temperature and hospitalisations for cardiovascular diseases in Queensland, Australia from 1995 to 2016: A time-stratified case-crossover study. *PLoS Med* 2020; 17:e1003176.

69. Wang X, Li G, Liu L, Westerdahl D, Jin X, Pan X. Effects of Extreme Temperatures on Cause-Specific Cardiovascular Mortality in China. *Int J Environ Res Public Health* 2015; 12:16136-16156.

70. Polcaro-Pichet S, Kosatsky T, Potter BJ, Bilodeau-Bertrand M, Auger N. Effects of cold temperature and snowfall on stroke mortality: A case-crossover analysis. *Environ Int* 2019; 126:89-95.

71. von Klot S, Zanobetti A, Schwartz J. Influenza epidemics, seasonality, and the effects of cold weather on cardiac mortality. *Environ Health* 2012; 11:74.

72. Moghadamnia MT, Ardalan A, Mesdaghinia A, Naddafi K, Yekaninejad MS. The Effects of Apparent Temperature on Cardiovascular Mortality Using a Distributed Lag Nonlinear Model Analysis: 2005 to 2014. *Asia Pac J Public Health* 2018; 30:361-368.

73. Breitner S, Wolf K, Peters A, Schneider A. Short-term effects of air temperature on cause-specific cardiovascular mortality in Bavaria, Germany. *Heart* 2014; 100:1272-1280.

74. Chen K, Breitner S, Wolf K, Hampel R, Meisinger C, Heier M, et al. Temporal variations in the triggering of myocardial infarction by air temperature in Augsburg, Germany, 1987-2014. *Eur Heart J* 2019; 40:1600-1608.

75. Nafstad P, Skrondal A, Bjertness E. Mortality and temperature in Oslo, Norway, 1990-1995. *Eur J Epidemiol* 2001; 17:621-627.

76. Zhang H, Wang Q, Zhang Y, Yang Y, Zhao Y, Sang J, et al. Modeling the impacts of ambient temperatures on cardiovascular mortality in Yinchuan: evidence from a northwestern city of China. *Environ Sci Pollut Res Int* 2018; 25:6036-6043.

77. Gholampour R, Darand M, Halabian AH. Impacts of cold and hot temperatures on mortality rate in Isfahan, Iran. *J Therm Biol* 2019; 86:102453.

78. Tsoutsoubi L, Ioannou LG, Flouris AD. Mortality due to circulatory causes in hot and cold environments in Greece. *Scand Cardiovasc J* 2021; 55:333-335.

79. Kim H, Heo J, Kim H, Lee JT. Has the impact of temperature on mortality really decreased over time? *Sci Total Environ* 2015; 512-513:74-81.

80. Anderson BG, Bell ML. Weather-related mortality: how heat, cold, and heat waves affect mortality in the United States. *Epidemiology* 2009; 20:205-213.

81. Saucy A, Ragettli MS, Vienneau D, de Hoogh K, Tangermann L, Schaffer B, et al. The role of extreme temperature in cause-specific acute cardiovascular mortality in Switzerland: A case-crossover study.



Sci Total Environ 2021; 790:147958.

82. Ebi KL, Exuzides KA, Lau E, Kelsh M, Barnston A. Weather changes associated with hospitalizations for cardiovascular diseases and stroke in California, 1983-1998. *Int J Biometeorol* 2004; 49:48-58.

83. Rocklov J, Forsberg B, Ebi K, Bellander T. Susceptibility to mortality related to temperature and heat and cold wave duration in the population of Stockholm County, Sweden. *Glob Health Action* 2014; 7:22737.

84. Wang Q, Gao C, Wang H, Lang L, Yue T, Lin H. Ischemic stroke hospital admission associated with ambient temperature in Jinan, China. *PLoS One* 2013; 8:e80381.

85. Hajat S, Haines A. Associations of cold temperatures with GP consultations for respiratory and cardiovascular disease amongst the elderly in London. *Int J Epidemiol* 2002; 31:825-830.

86. Shaposhnikov D, Revich B, Gurfinkel Y, Naumova E. The influence of meteorological and geomagnetic factors on acute myocardial infarction and brain stroke in Moscow, Russia. *Int J Biometeorol* 2014; 58:799-808.

87. Kovats RS, Hajat S, Wilkinson P. Contrasting patterns of mortality and hospital admissions during hot weather and heat waves in Greater London, UK. *Occup Environ Med* 2004; 61:893-898.

88. Wu PC, Lin CY, Lung SC, Guo HR, Chou CH, Su HJ. Cardiovascular mortality during heat and cold events: determinants of regional vulnerability in Taiwan. *Occup Environ Med* 2011; 68:525-530.

89. Kysely J, Pokorna L, Kyncl J, Kriz B. Excess cardiovascular mortality associated with cold spells in the Czech Republic. *BMC Public Health* 2009; 9:19.

90. Madrigano J, Mittleman MA, Baccarelli A, Goldberg R, Melly S, von Klot S, et al. Temperature, myocardial infarction, and mortality: effect modification by individual- and area-level characteristics. *Epidemiology* 2013; 24:439-446.

91. Lu P, Zhao Q, Xia G, Xu R, Hanna L, Jiang J, et al. Temporal trends of the association between ambient temperature and cardiovascular mortality: a 17-year case-crossover study. *Environmental Research Letters* 2021; 16:045004.

92. Bai L, Li Q, Wang J, Lavigne E, Gasparrini A, Copes R, et al. Increased coronary heart disease and stroke hospitalisations from ambient temperatures in Ontario. *Heart* 2018; 104:673-679.

93. Chen VY, Wu PC, Yang TC, Su HJ. Examining non-stationary effects of social determinants on cardiovascular mortality after cold surges in Taiwan. *Sci Total Environ* 2010; 408:2042-2049.

94. Martinez-Solanas E, Basagana X. Temporal changes in the effects of ambient temperatures on hospital admissions in Spain. *PLoS One* 2019; 14:e0218262.

95. Mohammad KN, Chan EYY, Wong MCS, Goggins WB, Chong KC. Ambient temperature, seasonal influenza and risk of cardiovascular disease in a subtropical area in Southern China. *Environ Res* 2020; 186:109546.

96. Ryti NRI, Makikyro EMS, Antikainen H, Hookana E, Junntila MJ, Ikaheimo TM, et al. Risk of sudden cardiac death in relation to season-specific cold spells: a case-crossover study in Finland. *BMJ Open* 2017; 7:e017398.

97. Ryti NRI, Junntila MJ, Antikainen H, Kortelainen ML, Huikuri HV, Jaakkola JJK. Coronary stenosis as a modifier of the effect of cold spells on the risk of sudden cardiac death: a case-crossover study in Finland. *BMJ Open* 2018; 8:e020865.

98. Sartini C, Barry SJE, Wannamethee SG, Whincup PH, Lennon L, Ford I, et al. Effect of cold spells and their modifiers on cardiovascular disease events: Evidence from two prospective studies. *Int J Cardiol* 2016; 218:275-283.

99. Wichmann J, Ketzl M, Ellermann T, Loft S. Apparent temperature and acute myocardial infarction

- hospital admissions in Copenhagen, Denmark: a case-crossover study. *Environ Health* 2012; 11:19.
100. Wang YC, Lin YK. Association between temperature and emergency room visits for cardiorespiratory diseases, metabolic syndrome-related diseases, and accidents in metropolitan Taipei. *PLoS One* 2014; 9:e99599.
101. Liang WM, Liu WP, Chou SY, Kuo HW. Ambient temperature and emergency room admissions for acute coronary syndrome in Taiwan. *Int J Biometeorol* 2008; 52:223-229.
102. Revich B, Shaposhnikov D. Excess mortality during heat waves and cold spells in Moscow, Russia. *Occup Environ Med* 2008; 65:691-696.
103. Dahlquist M, Raza A, Bero-Bedada G, Hollenberg J, Lind T, Orsini N, et al. Short-term departures from an optimum ambient temperature are associated with increased risk of out-of-hospital cardiac arrest. *Int J Hyg Environ Health* 2016; 219:389-397.
104. Lin YK, Zafirah Y, Ke MT, Andhikaputra G, Wang YC. The effects of extreme temperatures on emergency room visits-a population-based analysis by age, sex, and comorbidity. *Int J Biometeorol* 2021; 65:2087-2098.
105. Vaiciulis V, Jaakkola JJK, Radisauskas R, Tamosiunas A, Luksiene D, Rytis NRI. Association between winter cold spells and acute myocardial infarction in Lithuania 2000-2015. *Sci Rep* 2021; 11:17062.
106. Ma W, Yang C, Chu C, Li T, Tan J, Kan H. The impact of the 2008 cold spell on mortality in Shanghai, China. *Int J Biometeorol* 2013; 57:179-184.
107. Wichmann J, Andersen Z, Ketzel M, Ellermann T, Loft S. Apparent temperature and cause-specific emergency hospital admissions in Greater Copenhagen, Denmark. *PLoS One* 2011; 6:e22904.
108. Goggins WB, Chan EY. A study of the short-term associations between hospital admissions and mortality from heart failure and meteorological variables in Hong Kong: Weather and heart failure in Hong Kong. *Int J Cardiol* 2017; 228:537-542.
109. Kim A, Jung J, Hong J, Yoon SJ. Time series analysis of meteorological factors and air pollutants and their association with hospital admissions for acute myocardial infarction in Korea. *Int J Cardiol* 2021; 322:220-226.
110. Misailidou M, Pitsavos C, Panagiotakos DB, Chrysohoou C, Stefanadis C. Short-term effects of atmospheric temperature and humidity on morbidity from acute coronary syndromes in free of air pollution rural Greece. *Eur J Cardiovasc Prev Rehabil* 2006; 13:846-848.
111. Vasconcelos J, Freire E, Almendra R, Silva GL, Santana P. The impact of winter cold weather on acute myocardial infarctions in Portugal. *Environ Pollut* 2013; 183:14-18.
112. Son JY, Bell ML, Lee JT. The impact of heat, cold, and heat waves on hospital admissions in eight cities in Korea. *Int J Biometeorol* 2014; 58:1893-1903.
113. Ma W, Xu X, Peng L, Kan H. Impact of extreme temperature on hospital admission in Shanghai, China. *Sci Total Environ* 2011; 409:3634-3637.
114. Cho SK, Sohn J, Cho J, Noh J, Ha KH, Choi YJ, et al. Effect of Socioeconomic Status and Underlying Disease on the Association between Ambient Temperature and Ischemic Stroke. *Yonsei Med J* 2018; 59:686-692.
115. Yamazaki S, Michikawa T. Association between high and low ambient temperature and out-of-hospital cardiac arrest with cardiac etiology in Japan: a case-crossover study. *Environ Health Prev Med* 2017; 22:60.
116. Bai L, Cirendunzhu, Woodward A, Dawa, Zhaxisangmu, Chen B, et al. Temperature, hospital admissions and emergency room visits in Lhasa, Tibet: a time-series analysis. *Sci Total Environ* 2014; 490:838-848.

117. Tian L, Qiu H, Sun S, Lin H. Emergency Cardiovascular Hospitalization Risk Attributable to Cold Temperatures in Hong Kong. *Circ Cardiovasc Qual Outcomes* 2016; 9:135-142.
118. Xu Z, Tong S, Pan H, Cheng J. Associations of extreme temperatures with hospitalizations and post-discharge deaths for stroke: What is the role of pre-existing hyperlipidemia? *Environ Res* 2021; 193:110391.
119. Moghadamnia MT, Ardalan A, Mesdaghinia A, Naddafi K, Yekaninejad MS. Association between apparent temperature and acute coronary syndrome admission in Rasht, Iran. *Heart Asia* 2018; 10:e011068.
120. Onozuka D, Hagihara A. Out-of-hospital cardiac arrest risk attributable to temperature in Japan. *Sci Rep* 2017; 7:39538.
121. Shin J, Oh J, Kang IS, Ha E, Pyun WB. Effect of Short-Term Exposure to Fine Particulate Matter and Temperature on Acute Myocardial Infarction in Korea. *Int J Environ Res Public Health* 2021; 18.
122. Cheng J, Bambrick H, Tong S, Su H, Xu Z, Hu W. Winter temperature and myocardial infarction in Brisbane, Australia: Spatial and temporal analyses. *Sci Total Environ* 2020; 715:136860.
123. Zhou MG, Wang LJ, Liu T, Zhang YH, Lin HL, Luo Y, et al. Health impact of the 2008 cold spell on mortality in subtropical China: the climate and health impact national assessment study (CHINAs). *Environ Health* 2014; 13:60.
124. Ponjoan A, Blanch J, Alves-Cabratoso L, Marti-Lluch R, Comas-Cufi M, Parramon D, et al. Effects of extreme temperatures on cardiovascular emergency hospitalizations in a Mediterranean region: a self-controlled case series study. *Environ Health* 2017; 16:32.
125. Lee S, Lee E, Park MS, Kwon BY, Kim H, Jung DH, et al. Short-term effect of temperature on daily emergency visits for acute myocardial infarction with threshold temperatures. *PLoS One* 2014; 9:e94070.
126. Wang YC, Lin YK, Chen YJ, Hung SC, Zafirah Y, Sung FC. Ambulance Services Associated with Extreme Temperatures and Fine Particles in a Subtropical Island. *Sci Rep* 2020; 10:2855.
127. Moraes SL, Almendra R, Barrozo LV. Impact of heat waves and cold spells on cause-specific mortality in the city of Sao Paulo, Brazil. *Int J Hyg Environ Health* 2022; 239:113861.
128. Chen J, Yang J, Zhou M, Yin P, Wang B, Liu J, et al. Cold spell and mortality in 31 Chinese capital cities: Definitions, vulnerability and implications. *Environ Int* 2019; 128:271-278.
129. Doan TN, Wilson D, Rashford S, Bosley E. Ambient temperatures, heatwaves and out-of-hospital cardiac arrest in Brisbane, Australia. *Occup Environ Med* 2021.
130. Giang PN, Dung do V, Bao Giang K, Vinh HV, Rocklov J. The effect of temperature on cardiovascular disease hospital admissions among elderly people in Thai Nguyen Province, Vietnam. *Glob Health Action* 2014; 7:23649.
131. Niu Y, Chen R, Liu C, Ran P, Chen A, Chen X, et al. The association between ambient temperature and out-of-hospital cardiac arrest in Guangzhou, China. *Sci Total Environ* 2016; 572:114-118.
132. Thu Dang TA, Wraith D, Bambrick H, Dung N, Truc TT, Tong S, et al. Short - term effects of temperature on hospital admissions for acute myocardial infarction: A comparison between two neighboring climate zones in Vietnam. *Environ Res* 2019; 175:167-177.
133. Bijelovic S, Dragic N, Bijelovic M, Kovacevic M, Jevtic M, Ninkovic Mrdenovacki O. Impact of climate conditions on hospital admissions for subcategories of cardiovascular diseases. *Med Pr* 2017; 68:189-197.
134. Sangkharat K, Mahmood MA, Thornes JE, Fisher PA, Pope FD. Impact of extreme temperatures on ambulance dispatches in London, UK. *Environ Res* 2020; 182:109100.

135. Hensel M, Stuhr M, Geppert D, Kersten JF, Lorenz J, Kerner T. Relationship between ambient temperature and frequency and severity of cardiovascular emergencies: A prospective observational study based on out-of-hospital care data. *Int J Cardiol* 2017; 228:553-557.
136. Pourshaikhian M, Moghadamnia MT, Yekaninejad MS, Ghanbari A, Rashti AS, Afraz Kamachli S. The effects of meteorological variables on ambulance attendance for cardiovascular diseases in Rasht, Iran. *J Therm Biol* 2019; 83:150-156.
137. Zhan ZY, Zhong X, Yang J, Ding Z, Xie XX, Zheng ZQ, et al. Effect of apparent temperature on hospitalization from a spectrum of cardiovascular diseases in rural residents in Fujian, China. *Environ Pollut* 2022; 303:119101.
138. Han J, Liu S, Zhang J, Zhou L, Fang Q, Zhang J, et al. The impact of temperature extremes on mortality: a time-series study in Jinan, China. *BMJ Open* 2017; 7:e014741.
139. Mohammadi D, Zare Zadeh M, Zare Sakhvidi MJ. Short-term exposure to extreme temperature and risk of hospital admission due to cardiovascular diseases. *Int J Environ Health Res* 2021; 31:344-354.
140. Zhao Q, Zhao Y, Li S, Zhang Y, Wang Q, Zhang H, et al. Impact of ambient temperature on clinical visits for cardio-respiratory diseases in rural villages in northwest China. *Sci Total Environ* 2018; 612:379-385.
141. Luo Y, Li H, Huang F, Van Halm-Lutterodt N, Qin X, Wang A, et al. The cold effect of ambient temperature on ischemic and hemorrhagic stroke hospital admissions: A large database study in Beijing, China between years 2013 and 2014-Utilizing a distributed lag non-linear analysis. *Environ Pollut* 2018; 232:90-96.
142. Guo P, Zheng M, Wang Y, Feng W, Wu J, Deng C, et al. Effects of ambient temperature on stroke hospital admissions: Results from a time-series analysis of 104,432 strokes in Guangzhou, China. *Sci Total Environ* 2017; 580:307-315.
143. Gao J, Yu F, Xu Z, Duan J, Cheng Q, Bai L, et al. The association between cold spells and admissions of ischemic stroke in Hefei, China: Modified by gender and age. *Sci Total Environ* 2019; 669:140-147.
144. Lei J, Chen R, Yin P, Meng X, Zhang L, Liu C, et al. Association between Cold Spells and Mortality Risk and Burden: A Nationwide Study in China. *Environ Health Perspect* 2022; 130:27006.
145. Liu X, Kong D, Fu J, Zhang Y, Liu Y, Zhao Y, et al. Association between extreme temperature and acute myocardial infarction hospital admissions in Beijing, China: 2013-2016. *PLoS One* 2018; 13:e0204706.
146. Akilu D, Wang T, Amsalu E, Feng W, Li Z, Li X, et al. Short-term effects of extreme temperatures on cause specific cardiovascular admissions in Beijing, China. *Environ Res* 2020; 186:109455.
147. Garcia-Lledo A, Rodriguez-Martin S, Tobias A, Alonso-Martin J, Ansedo-Cascudo JC, de Abajo FJ. Heat waves, ambient temperature, and risk of myocardial infarction: an ecological study in the Community of Madrid. *Rev Esp Cardiol (Engl Ed)* 2020; 73:300-306.
148. Guo S, Niu Y, Cheng Y, Chen R, Kan J, Kan H, et al. Association between ambient temperature and daily emergency hospitalizations for acute coronary syndrome in Yancheng, China. *Environ Sci Pollut Res Int* 2020; 27:3885-3891.
149. Wang ZX, Cheng YB, Wang Y, Wang Y, Zhang XH, Song HJ, et al. Burden of Outpatient Visits Attributable to Ambient Temperature in Qingdao, China. *Biomed Environ Sci* 2021; 34:395-399.
150. Wang Q, He Y, Hajat S, Cheng J, Xu Z, Hu W, et al. Temperature-sensitive morbidity indicator: consequence from the increased ambulance dispatches associated with heat and cold exposure. *Int J*

Biometeorol 2021; 65:1871-1880.

151. Cui L, Geng X, Ding T, Tang J, Xu J, Zhai J. Impact of ambient temperature on hospital admissions for cardiovascular disease in Hefei City, China. *Int J Biometeorol* 2019; 63:723-734.

152. Mohammad MA, Koul S, Rylance R, Frobert O, Alfredsson J, Sahlen A, et al. Association of Weather With Day-to-Day Incidence of Myocardial Infarction: A SWEDEHEART Nationwide Observational Study. *JAMA Cardiol* 2018; 3:1081-1089.

153. Li N, Ma J, Liu F, Zhang Y, Ma P, Jin Y, et al. Associations of apparent temperature with acute cardiac events and subtypes of acute coronary syndromes in Beijing, China. *Sci Rep* 2021; 11:15229.

154. Borghei Y, Moghadamnia MT, Sigaroudi AE, Ghanbari A. Association between climate variables (cold and hot weathers, humidity, atmospheric pressures) with out-of-hospital cardiac arrests in Rasht, Iran. *J Therm Biol* 2020; 93:102702.

155. Li Y, Ji C, Ju H, Han Y. Impact of ambient temperature and atmospheric evaporation on the incidence of acute deep venous thrombosis in the northeast of China. *Int Angiol* 2017; 36:243-253.

156. Di Blasi C, Renzi M, Michelozzi P, De' Donato F, Scortichini M, Davoli M, et al. Association between air temperature, air pollution and hospital admissions for pulmonary embolism and venous thrombosis in Italy. *Eur J Intern Med* 2022; 96:74-80.

157. Chen J, Gao Y, Jiang Y, Li H, Lv M, Duan W, et al. Low ambient temperature and temperature drop between neighbouring days and acute aortic dissection: a case-crossover study. *Eur Heart J* 2022; 43:228-235.

158. Yu X, Xia L, Xiao J, Zheng J, Xu N, Feng X, et al. Association of Daily Mean Temperature and Temperature Variability With Onset Risks of Acute Aortic Dissection. *J Am Heart Assoc* 2021; 10:e020190.

159. Zhang Q, Peng L, Hu J, Li H, Jiang Y, Fang W, et al. Low temperature and temperature decline increase acute aortic dissection risk and burden: A nationwide case crossover analysis at hourly level among 40,270 patients. *Lancet Reg Health West Pac* 2022; 28:100562.

160. Ho HC, Wong MS. Urban environmental influences on the temperature-mortality relationship associated mental disorders and cardiorespiratory diseases during normal summer days in a subtropical city. *Environ Sci Pollut Res Int* 2019; 26:24272-24285.

161. Viswanathan M, Ansari MT, Berkman ND, Chang S, Hartling L, McPheeters M, et al. Assessing the Risk of Bias of Individual Studies in Systematic Reviews of Health Care Interventions. *Methods Guide for Effectiveness and Comparative Effectiveness Reviews*. Rockville (MD)2008.

162. Viswanathan M, Berkman ND, Dryden DM, Hartling L. Assessing Risk of Bias and Confounding in Observational Studies of Interventions or Exposures: Further Development of the RTI Item Bank. Rockville (MD)2013.

163. Johnson PI, Sutton P, Atchley DS, Koustas E, Lam J, Sen S, et al. The Navigation Guide - evidence-based medicine meets environmental health: systematic review of human evidence for PFOA effects on fetal growth. *Environ Health Perspect* 2014; 122:1028-1039.
